# Supplementary material for: How do psychological characteristics of family members affected by substance use influence quality of life?
Source: Qual Life Res. 2019 Mar 20;28(8):2161–70. doi: 10.1007/s11136-019-02169-x (PMC6620238; doi:10.1007/s11136-019-02169-x)
Supplement: Supplementary file 1 — Supplementary material 1 (CSV 100 KB) [file 11136_2019_2169_MOESM1_ESM.csv]

1	3	-99	1	55	1	3	2	1	3	2	3	4	3	4	3	3	4	4	3	-99	3	3	-99	4	3	3	4	3	3	3	2	3	3	3	3	3	3	3	3	0.70	0.70	0.70	0.90	-99.00	0.50	0.70	2.92	0.77	3.33
1	1	1	2	27	1	4	1	1	4	2	2	4	4	3	2	2	2	2	2	2	4	4	2	4	4	2	2	2	2	2	2	2	2	2	2	3	2	2	3	0.70	0.70	0.70	0.70	0.70	0.70	0.70	2.17	0.70	4.00
1	1	1	2	20	0	2	1	1	2	1	3	3	-99	2	4	3	2	3	1	4	2	3	1	3	2	4	1	3	3	3	2	1	2	2	2	2	2	2	2	0.90	0.70	0.70	0.90	-99.00	0.90	0.70	2.17	0.80	2.50
1	1	1	2	38	0	4	1	1	4	2	3	4	3	2	4	3	3	2	3	3	3	4	2	4	1	2	1	2	2	3	2	2	2	3	2	2	3	3	3	0.50	0.70	0.70	0.70	0.30	0.50	0.70	2.42	0.60	3.67
1	1	1	1	60	0	4	1	1	3	2	4	4	4	3	4	4	4	3	3	4	4	5	2	4	3	2	4	2	2	2	2	2	2	2	2	2	3	2	2	0.50	0.90	0.90	0.90	0.90	0.70	0.70	2.08	0.83	3.67
1	3	-99	1	31	0	2	2	1	3	2	3	4	3	3	3	3	1	3	2	2	4	4	2	3	1	2	2	2	2	2	2	2	2	1	2	2	2	2	2	0.70	0.90	0.90	0.70	0.70	0.70	0.70	1.92	0.80	3.00
1	1	1	1	25	0	2	1	1	5	2	3	4	4	4	3	3	3	5	4	4	3	4	4	3	5	2	3	1	2	2	1	2	2	2	1	1	2	1	2	0.70	0.70	0.50	0.70	-99.00	0.70	0.70	1.58	0.63	4.00
1	1	1	2	20	0	2	1	1	2	1	3	3	2	2	4	2	1	4	2	4	2	3	1	1	3	4	2	2	2	4	3	4	3	3	2	2	2	3	4	0.50	0.30	0.70	0.70	-99.00	0.50	0.50	2.83	0.60	1.67
1	1	1	2	22	0	2	1	1	2	3	2	4	3	4	2	2	3	3	2	3	3	4	2	4	2	3	2	2	2	2	1	2	1	2	1	2	2	1	2	0.50	0.50	0.50	0.70	-99.00	0.70	0.70	1.67	0.57	3.00
1	1	1	1	24	0	3	1	1	2	1	3	4	4	4	5	3	3	4	1	4	3	3	1	4	3	3	2	2	2	2	1	2	2	3	1	2	2	2	2	0.70	0.90	0.70	0.70	-99.00	0.70	0.70	1.92	0.73	3.33
1	1	1	2	46	0	4	1	1	2	1	1	2	1	1	4	2	2	4	2	2	2	4	2	2	2	2	2	2	2	2	2	2	2	2	2	2	2	2	2	0.70	0.90	0.90	0.70	0.70	0.70	0.70	2.00	0.80	1.67
1	1	1	2	44	0	2	1	1	3	2	2	4	3	3	2	2	3	4	4	3	4	4	2	4	3	4	3	2	2	2	2	2	2	2	2	3	2	2	2	0.70	0.50	0.70	0.70	0.70	0.70	0.50	2.08	0.67	3.33
1	1	1	2	28	1	4	1	1	2	4	2	5	4	4	2	3	2	4	4	4	4	4	2	4	4	2	2	2	2	2	2	2	2	2	2	2	2	1	2	0.70	0.70	0.70	0.70	0.70	0.70	0.70	1.92	0.70	3.33
1	1	1	2	40	1	4	1	1	1	1	1	1	1	1	3	4	1	4	2	2	1	4	1	1	1	4	3	3	3	4	4	4	4	4	4	4	4	4	4	0.70	0.90	0.90	0.90	-99.00	0.70	0.90	3.83	0.87	1.00
1	1	1	2	49	1	3	1	1	3	1	2	3	1	1	4	2	1	1	1	1	2	3	2	3	1	2	1	2	2	2	3	2	2	3	3	2	2	2	3	0.70	0.70	0.70	0.70	-99.00	0.70	0.70	2.33	0.70	2.33
1	1	1	2	26	0	4	1	1	1	3	4	3	1	4	5	5	4	4	3	4	2	2	3	3	3	3	4	3	2	2	2	2	3	3	3	4	4	3	3	0.70	0.50	0.50	0.50	0.90	0.50	0.50	2.83	0.60	1.67
1	3	-99	2	37	0	4	2	1	2	1	1	1	2	4	2	2	2	4	2	4	4	3	2	4	2	1	2	2	2	3	2	2	2	3	2	2	2	2	1	0.90	0.70	0.90	0.90	-99.00	0.70	0.70	2.08	0.87	2.67
1	1	1	2	61	0	4	1	1	4	3	2	4	2	1	4	3	2	2	2	2	2	2	2	3	2	2	2	2	2	2	2	2	2	2	2	2	2	2	2	0.90	0.90	0.90	0.90	0.90	0.90	0.90	2.00	0.90	3.00
1	1	1	1	67	0	-99	1	1	2	2	2	4	2	4	4	2	2	2	2	4	2	4	2	2	2	1	2	2	2	2	2	2	2	1	2	2	2	4	2	0.70	0.90	0.90	0.70	0.90	0.90	-99.00	2.08	0.83	2.00
1	1	1	2	61	0	3	1	1	2	4	2	5	4	3	2	1	2	2	3	2	3	4	2	3	2	2	2	2	2	2	1	2	2	1	1	2	2	2	2	0.90	0.90	0.90	0.90	0.90	0.90	0.90	1.75	0.90	3.00
1	1	1	1	45	0	4	1	1	2	1	1	3	1	2	2	2	2	3	1	2	3	2	1	3	1	2	2	2	1	2	1	2	1	1	2	2	2	2	1	0.90	0.90	0.90	0.90	0.70	0.70	0.90	1.58	0.87	2.00
1	1	1	1	53	0	2	1	1	3	2	3	3	4	3	4	4	4	3	2	3	4	4	3	3	2	2	3	2	2	2	2	2	2	2	2	2	2	2	2	0.90	0.90	0.70	0.90	0.90	0.90	0.90	2.00	0.83	3.33
1	1	1	1	21	1	3	1	1	3	3	4	4	2	2	4	3	2	3	3	3	4	4	2	4	1	2	2	2	2	2	2	2	2	2	2	2	2	2	2	0.90	0.90	0.70	0.90	-99.00	0.70	0.90	2.00	0.83	3.00
1	1	1	2	53	0	4	1	1	2	3	2	3	3	3	2	2	2	4	2	4	4	4	2	4	2	2	2	2	2	2	2	2	2	3	3	2	3	3	2	0.70	0.90	0.50	0.50	0.70	0.70	0.70	2.33	0.63	3.00
1	1	1	1	61	0	4	1	1	4	1	2	4	3	2	4	4	2	4	2	3	4	4	2	4	2	3	3	1	2	2	2	2	2	2	2	2	2	2	2	0.90	0.90	0.90	0.90	0.70	0.90	0.90	1.92	0.87	3.67
1	3	-99	2	58	0	2	2	1	4	2	3	4	3	4	3	4	4	2	3	3	4	4	3	3	2	2	2	2	2	2	2	3	2	2	2	2	2	4	1	0.70	0.70	0.90	0.90	0.90	0.70	0.90	2.17	0.83	3.33
1	1	1	2	59	0	4	1	1	3	1	2	4	2	3	4	2	1	4	1	2	2	4	1	2	2	1	1	-99	-99	-99	-99	-99	-99	-99	-99	-99	-99	-99	4	0.90	0.90	0.90	0.90	0.90	0.90	0.90	-99	0.90	2.33
1	3	-99	2	53	1	4	2	1	2	2	2	4	2	2	2	2	2	4	2	2	2	4	2	4	2	2	2	3	2	1	1	1	1	2	1	2	1	1	1	0.90	0.90	0.70	0.70	0.90	0.90	0.90	1.42	0.80	2.67
1	1	1	1	21	0	2	1	1	4	2	4	4	3	3	5	4	2	2	3	4	2	2	2	3	2	2	3	3	2	3	1	3	2	2	2	3	2	3	2	0.70	0.50	0.50	0.50	-99.00	0.70	0.50	2.33	0.53	3.33
1	1	1	2	54	0	4	1	1	2	1	3	5	3	1	4	2	2	3	2	2	3	3	1	3	1	2	2	1	1	1	2	2	2	2	2	1	1	1	2	0.70	0.90	0.70	0.90	0.90	0.90	0.90	1.50	0.80	2.67
1	1	1	1	49	0	4	1	1	3	2	2	4	3	3	3	2	3	3	3	3	4	4	3	4	2	2	3	3	2	2	2	2	2	2	2	2	2	2	2	0.50	0.70	0.70	0.70	0.70	0.70	0.50	2.08	0.67	3.33
1	1	1	2	57	0	4	1	1	2	2	2	2	2	2	3	2	3	3	2	2	2	2	1	2	1	2	2	2	2	2	2	2	2	1	2	2	2	2	2	0.90	0.90	0.90	0.90	0.90	0.90	0.90	1.92	0.90	2.00
1	3	-99	1	74	1	3	2	1	2	3	2	3	2	4	3	2	2	4	3	2	2	2	3	2	2	2	2	2	2	2	2	2	3	2	2	2	3	2	3	0.70	0.50	0.70	0.70	0.50	0.70	0.70	2.25	0.63	2.00
1	1	1	1	27	0	3	1	1	4	3	2	4	4	3	4	3	4	2	4	3	4	4	3	4	2	2	3	2	2	2	1	2	2	2	1	2	2	1	2	0.90	0.90	0.70	0.70	0.90	0.90	0.70	1.75	0.80	4.00
1	1	1	2	57	0	4	1	1	3	2	2	2	2	2	3	2	2	3	2	3	3	4	2	2	2	2	2	2	2	2	2	2	2	2	2	2	2	2	2	0.70	0.70	0.70	0.70	0.70	0.70	0.70	2.00	0.70	2.33
1	1	1	2	56	0	4	1	1	2	5	1	2	1	1	4	1	3	4	1	3	3	5	1	4	5	4	2	2	2	2	2	1	1	1	2	3	2	1	2	0.70	0.70	0.70	0.70	0.90	0.90	0.90	1.75	0.73	2.33
1	1	1	2	52	0	4	1	1	3	1	2	4	1	2	4	2	2	2	2	2	4	4	1	2	2	2	1	3	2	2	1	2	2	2	2	2	2	2	2	0.70	0.70	0.70	0.70	0.70	0.70	0.70	2.00	0.70	2.00
1	1	1	2	57	0	3	1	1	3	1	1	1	1	1	4	3	2	2	1	1	2	2	2	4	2	1	2	2	1	2	1	2	1	1	1	2	2	1	1	0.90	0.90	0.90	0.90	0.90	0.90	0.90	1.42	0.90	2.67
1	1	1	2	53	0	4	1	1	2	1	2	3	4	2	4	2	2	2	2	2	2	3	1	2	2	-99	2	2	1	2	2	2	2	2	1	2	2	2	2	0.70	0.70	0.70	0.70	0.90	0.70	0.90	1.83	0.73	2.67
1	1	1	1	42	0	4	1	1	2	2	3	5	2	4	4	4	2	1	4	3	4	4	2	4	2	3	4	2	2	2	1	2	1	1	2	2	1	1	1	0.90	0.90	0.90	0.90	0.90	0.90	0.90	1.50	0.90	2.67
1	1	1	1	55	0	4	1	1	2	2	2	4	2	2	4	2	2	2	2	2	2	4	2	4	2	2	2	2	2	2	2	2	2	1	1	2	2	1	1	0.90	0.90	0.90	0.70	0.90	0.90	0.90	1.67	0.87	2.67
1	1	1	1	50	0	4	1	1	2	2	2	3	2	2	3	3	3	2	2	2	3	3	2	4	1	2	2	2	2	2	2	2	2	2	2	2	2	2	2	0.70	0.90	0.90	0.70	-99.00	0.70	0.70	2.00	0.80	2.67
1	3	-99	2	40	0	2	2	1	4	2	4	4	4	4	4	4	4	2	4	4	4	4	4	4	4	4	4	2	2	3	2	2	2	3	2	2	2	2	2	0.70	0.50	0.50	0.70	0.70	0.70	0.70	2.17	0.60	4.00
1	3	-99	2	37	0	3	2	1	5	4	2	4	4	4	1	1	2	2	5	2	4	5	5	5	5	1	1	2	2	2	1	2	2	2	2	2	3	1	2	0.30	0.30	0.50	0.70	0.70	0.50	0.90	1.92	0.50	4.67
1	1	1	2	54	0	4	1	1	4	1	2	5	2	3	2	2	2	4	2	2	4	4	2	4	1	2	2	1	2	2	1	2	1	1	1	2	1	1	2	0.50	0.70	0.70	0.90	0.90	0.70	0.70	1.42	0.73	3.33
1	1	1	2	66	1	2	1	1	3	2	2	4	4	3	2	2	3	4	1	1	3	5	3	3	3	1	2	2	2	1	1	1	1	2	1	2	2	1	2	0.70	0.70	0.70	0.90	-99.00	0.90	0.50	1.50	0.77	3.33
1	1	1	1	55	0	2	1	1	4	2	2	4	4	3	2	3	2	2	2	4	3	3	2	3	3	3	2	3	2	3	2	3	2	2	2	2	3	2	2	0.70	0.70	0.70	0.70	0.70	0.70	0.70	2.33	0.70	3.67
1	1	1	2	56	1	4	1	1	1	1	1	5	2	1	1	1	4	2	2	2	2	4	1	2	2	1	1	1	1	1	1	1	1	1	1	1	2	2	1	0.70	0.70	0.90	0.90	-99.00	0.90	0.90	1.17	0.83	1.67
1	3	-99	2	55	0	4	2	1	5	2	3	4	3	4	5	4	4	4	3	4	4	4	2	4	3	4	4	2	3	2	2	2	2	4	2	2	2	3	2	0.70	0.50	0.50	0.70	0.90	0.70	0.50	2.33	0.63	4.00
1	1	1	1	63	0	4	1	1	3	1	2	5	4	4	2	2	4	3	4	2	4	4	3	-99	3	3	2	2	1	2	1	2	1	1	2	1	2	1	2	0.70	0.90	0.90	0.70	0.90	0.90	-99.00	1.50	0.83	3.50
1	3	-99	2	49	0	4	2	1	3	4	2	4	4	4	2	2	4	4	4	4	4	4	4	4	2	3	3	3	3	4	3	4	3	4	3	3	3	3	3	0.70	0.70	0.70	0.70	-99.00	0.70	0.70	3.25	0.70	3.67
1	1	1	2	41	1	3	1	1	3	2	5	4	2	2	5	4	3	2	2	3	3	4	1	3	2	2	4	2	2	2	1	2	2	1	1	2	2	1	3	0.50	0.50	0.70	0.90	-99.00	0.70	0.70	1.75	0.70	2.67
1	1	1	1	51	0	2	1	1	4	1	1	4	2	4	2	1	2	4	2	2	3	4	2	4	2	2	1	2	2	2	2	2	2	2	2	2	2	1	2	0.90	0.90	0.90	0.90	0.90	0.90	0.90	1.92	0.90	3.33
1	1	1	2	55	0	3	1	1	2	1	3	4	4	2	3	4	2	5	3	4	2	4	1	4	4	4	4	3	2	3	2	2	2	2	2	2	2	3	3	0.50	0.30	0.50	0.70	0.50	0.70	0.50	2.33	0.50	3.33
1	1	1	1	62	0	2	1	1	3	2	3	4	3	3	3	3	2	3	2	3	3	4	2	4	2	3	2	2	2	2	2	2	2	2	2	2	2	2	2	0.50	0.50	0.50	0.70	0.70	0.70	0.70	2.00	0.57	3.33
1	1	1	2	51	1	2	1	1	4	2	1	2	2	2	2	2	2	4	2	2	2	2	2	3	3	2	2	3	3	3	3	3	3	3	3	3	2	3	4	0.30	0.50	0.50	0.50	-99.00	0.30	0.30	3.00	0.47	3.00
1	1	1	2	51	0	4	1	1	2	1	2	1	4	1	5	3	1	4	1	1	2	2	1	1	1	1	1	1	1	1	1	1	2	1	1	1	1	1	2	0.70	0.90	0.90	0.90	0.90	0.90	0.90	1.17	0.87	2.33
1	1	1	2	59	1	4	1	1	3	2	2	4	2	3	2	2	2	3	2	2	3	3	3	3	2	2	2	2	2	2	2	2	2	2	2	2	2	2	3	0.50	0.70	0.70	0.70	-99.00	0.70	0.70	2.08	0.67	2.67
1	3	-99	2	52	0	4	2	1	4	3	2	3	1	1	3	2	2	4	2	2	4	4	1	3	1	1	2	2	1	1	1	1	1	2	1	2	2	2	2	0.90	0.70	0.50	0.90	0.70	0.90	0.70	1.50	0.70	2.67
1	1	1	2	49	0	4	1	1	1	1	1	2	2	2	3	2	2	4	2	2	3	3	2	2	1	2	2	3	2	2	2	3	2	2	2	3	2	2	2	0.50	0.70	0.70	0.70	0.50	0.50	-99.00	2.25	0.63	1.67
1	1	1	2	65	0	4	1	1	2	2	3	4	2	3	3	2	2	1	1	2	3	4	1	3	1	2	1	2	2	2	2	1	2	2	2	1	3	1	2	0.70	0.70	0.70	0.70	0.70	0.70	0.70	1.83	0.70	2.33
1	1	1	2	40	0	4	1	1	3	1	5	4	4	4	4	4	5	3	1	5	5	5	1	5	2	4	5	3	4	4	1	4	2	1	4	3	3	2	2	0.50	0.50	0.70	0.70	-99.00	0.70	0.70	2.75	0.63	4.00
1	1	1	1	69	1	4	1	1	2	5	2	5	2	3	4	2	2	2	4	-99	2	-99	1	3	3	2	1	2	2	2	2	2	4	3	1	2	1	1	2	0.70	0.70	0.70	0.70	-99.00	0.90	0.70	2.00	0.70	2.33
1	1	1	2	27	0	4	1	1	4	1	5	3	2	2	5	5	5	4	1	5	1	2	4	3	5	1	3	2	2	4	3	4	3	2	4	2	2	3	3	0.90	0.30	0.30	0.90	-99.00	0.90	0.70	2.83	0.60	3.00
1	1	1	2	29	0	4	1	1	3	2	1	4	2	2	4	2	2	4	2	2	2	4	2	3	2	4	1	2	1	1	2	1	1	2	2	1	1	2	2	0.70	0.70	0.70	0.70	0.70	0.70	0.70	1.50	0.70	2.67
1	1	1	2	47	0	4	1	1	3	2	2	3	1	2	5	1	2	3	1	2	3	4	2	4	2	2	2	2	2	2	2	3	2	2	2	2	2	2	2	0.70	0.70	0.70	0.70	0.70	0.70	0.70	2.08	0.70	2.67
1	3	-99	2	28	0	2	2	1	4	3	2	4	4	4	2	4	4	3	3	4	4	3	2	4	4	4	4	3	3	3	2	4	3	4	2	3	3	3	3	0.50	0.30	0.50	0.70	0.30	0.30	0.50	3.00	0.47	4.00
1	1	1	2	26	0	4	1	1	4	1	4	5	4	2	4	4	3	5	3	5	4	4	2	4	4	2	2	2	2	4	3	4	2	2	3	3	3	3	2	0.70	0.50	0.50	0.70	0.30	0.90	0.50	2.75	0.53	4.00
1	1	1	1	62	0	4	1	1	2	1	1	4	1	1	3	3	2	4	2	4	3	4	2	3	2	4	4	2	2	2	2	2	2	2	2	2	2	1	1	0.90	0.90	0.90	0.90	0.90	0.90	0.90	1.83	0.90	2.00
1	1	1	2	62	0	4	1	1	4	1	3	4	3	4	4	4	2	2	1	2	4	4	1	4	1	3	3	1	1	2	1	2	2	1	1	1	2	1	2	0.90	0.70	0.70	0.70	0.70	0.90	0.70	1.42	0.73	3.67
1	1	1	1	65	0	3	1	1	4	1	3	4	2	3	3	3	2	1	1	2	3	4	1	4	1	1	2	1	2	2	1	2	2	1	2	1	1	1	3	0.70	0.90	0.90	0.70	0.90	0.90	0.90	1.58	0.83	3.33
1	1	1	2	53	1	4	1	1	4	2	2	4	2	2	3	2	2	3	2	2	2	4	2	4	2	2	2	2	2	2	2	3	2	2	2	2	2	2	2	0.70	0.70	0.70	0.90	0.70	0.70	0.70	2.08	0.73	3.33
1	1	1	2	31	0	4	1	1	2	4	1	4	1	3	1	1	1	3	4	2	4	4	2	3	2	2	1	1	1	1	2	1	1	2	2	1	1	1	1	0.90	0.70	0.70	0.70	0.90	0.90	0.90	1.25	0.77	2.00
1	1	1	1	52	0	4	1	1	2	2	2	2	2	2	3	2	3	3	2	3	3	3	2	2	2	2	3	2	2	2	2	2	2	2	2	2	2	2	2	0.70	0.70	0.70	0.70	0.70	0.70	0.70	2.00	0.70	2.00
1	1	1	1	64	0	4	1	1	4	1	2	4	1	2	2	2	1	4	1	2	3	4	1	2	1	1	1	4	2	2	2	1	1	4	1	1	4	1	1	0.90	0.70	0.90	0.90	0.90	0.90	0.90	2.00	0.87	2.33
1	1	1	2	58	0	4	1	1	2	4	1	5	2	3	2	1	1	4	2	1	2	2	2	2	2	2	1	2	2	1	2	1	2	2	2	2	2	2	1	0.70	0.90	0.70	0.90	0.50	0.70	0.70	1.75	0.73	2.00
1	1	1	2	53	0	4	1	1	2	1	1	3	2	2	5	2	2	2	1	-99	2	2	2	2	2	2	2	2	-99	2	2	2	2	2	2	2	2	2	2	0.90	0.90	0.90	0.90	0.90	0.90	0.90	2.00	0.90	2.00
1	1	1	1	58	0	2	1	1	3	2	2	3	2	3	4	4	3	2	2	4	3	3	2	2	2	2	2	2	2	3	2	2	2	2	2	2	2	2	2	0.70	0.70	0.70	0.70	0.70	0.70	0.70	2.08	0.70	2.33
1	1	1	1	42	0	4	1	1	2	1	4	3	3	4	4	4	2	1	4	1	4	5	2	2	1	3	3	2	1	2	1	1	1	1	1	2	1	1	1	0.90	0.90	0.90	0.90	0.90	0.90	0.90	1.25	0.90	2.33
1	3	-99	1	55	0	1	2	1	3	2	2	4	2	2	2	4	4	2	2	2	2	2	2	2	2	2	2	2	2	2	2	2	1	2	2	2	2	1	2	0.50	0.70	0.70	0.70	0.70	0.70	0.70	1.83	0.67	2.33
1	1	1	1	59	0	4	1	1	2	1	2	3	1	2	3	2	1	3	3	2	2	3	3	3	1	2	2	4	-99	3	2	3	2	2	1	2	2	-99	2	0.90	0.90	0.90	0.90	0.90	0.90	0.90	2.30	0.90	2.00
1	1	1	1	50	0	4	1	1	4	2	2	4	2	2	3	3	2	2	2	2	3	2	2	3	2	2	2	2	2	2	2	2	2	1	1	2	2	2	1	0.90	0.90	0.90	0.70	0.90	0.70	0.90	1.75	0.87	3.00
1	3	-99	1	57	0	4	2	1	4	2	1	2	1	3	-99	2	3	4	1	3	4	3	2	3	2	2	1	1	2	1	2	1	1	3	2	2	2	1	1	0.70	-99.00	0.90	-99.00	0.90	0.70	0.70	1.58	0.83	2.67
1	1	1	2	40	0	4	1	1	3	2	2	3	1	1	3	3	1	4	2	3	3	3	2	2	1	1	1	4	1	2	1	1	1	2	2	1	1	1	4	0.90	0.90	0.90	0.90	0.90	0.70	0.90	1.75	0.90	2.00
1	3	-99	2	57	0	2	2	1	2	4	2	2	4	2	2	4	2	2	2	3	4	4	2	4	2	3	2	2	3	2	2	2	2	3	2	3	2	2	2	0.70	0.70	0.70	0.70	0.70	0.30	0.70	2.25	0.70	3.33
1	1	1	2	54	0	2	1	1	3	4	4	4	4	4	3	4	2	5	3	4	4	5	3	5	4	4	4	3	3	3	3	3	3	4	3	3	3	2	3	0.30	0.50	0.30	0.70	0.70	0.70	-99.00	3.00	0.47	4.00
1	1	1	1	63	0	2	1	1	3	1	2	3	2	2	2	2	2	4	2	4	4	4	2	4	2	1	2	2	1	1	1	2	1	2	2	2	2	1	1	0.70	0.90	0.70	0.70	0.90	0.90	0.90	1.50	0.77	3.00
1	3	-99	1	50	1	2	2	1	3	2	5	3	4	3	5	4	4	5	3	4	3	3	4	4	4	3	4	3	3	3	3	3	4	3	3	3	3	3	4	0.30	0.30	0.10	0.30	0.10	0.50	0.30	3.17	0.20	3.67
1	1	1	2	33	0	4	1	1	4	2	2	4	2	2	3	3	2	4	2	2	3	4	2	4	2	2	2	2	2	2	2	2	2	2	2	2	2	2	2	0.70	0.70	0.70	0.70	0.70	0.70	0.70	2.00	0.70	3.33
1	1	1	2	35	0	4	1	1	4	2	4	4	5	4	4	4	3	2	4	5	5	5	3	5	4	4	4	2	3	2	2	2	2	2	3	2	2	1	2	0.50	0.70	0.50	0.50	0.50	0.50	0.70	2.08	0.53	4.67
1	1	1	2	49	0	2	1	2	3	4	4	4	4	4	4	4	4	4	3	4	4	4	2	4	3	3	3	2	2	2	3	3	3	3	3	3	2	2	3	0.50	0.50	0.50	0.50	0.50	0.50	0.50	2.58	0.50	3.67
1	1	1	1	39	0	4	1	1	4	1	2	4	3	1	3	3	3	3	2	3	3	4	2	3	2	2	2	1	2	1	1	2	1	1	1	1	4	1	1	0.70	0.50	0.70	0.70	0.90	0.90	0.70	1.42	0.70	3.33
1	1	1	2	27	1	4	1	1	4	1	3	4	2	3	4	3	1	4	3	5	4	5	2	5	2	4	4	1	1	3	2	2	3	2	2	1	2	1	2	0.50	0.50	0.70	0.50	-99.00	0.70	0.50	1.83	0.57	3.67
1	3	-99	2	38	0	4	2	1	4	1	1	4	2	4	4	4	2	4	2	4	4	4	4	4	2	2	2	2	2	2	2	2	2	3	2	3	2	2	2	0.70	0.50	0.70	0.90	-99.00	0.70	0.70	2.17	0.73	3.33
1	1	1	2	50	0	4	1	1	1	1	2	2	2	2	2	2	1	2	3	2	3	4	2	3	2	3	2	2	2	1	1	1	1	2	2	2	2	1	2	0.70	0.90	0.70	0.90	0.90	0.90	0.70	1.58	0.80	2.00
1	1	1	2	50	0	1	1	1	3	2	3	4	4	4	4	4	3	4	4	4	3	3	3	4	3	3	4	3	2	3	2	3	2	3	2	3	3	3	4	0.70	0.70	0.70	0.90	0.50	0.90	0.70	2.75	0.70	3.67
1	1	1	1	43	0	4	1	1	4	2	4	5	3	4	5	4	4	2	3	4	5	5	3	4	4	3	2	2	2	2	1	2	2	1	2	2	2	1	2	0.70	0.90	0.90	0.90	0.90	0.70	0.70	1.75	0.87	3.67
1	3	-99	2	49	0	4	2	1	2	1	1	4	2	1	1	1	1	4	1	2	4	4	1	4	1	1	1	1	2	1	1	1	1	1	1	1	4	1	1	0.90	0.90	0.90	0.90	0.90	0.90	0.90	1.33	0.90	2.67
1	3	-99	2	58	0	3	2	1	2	1	2	2	1	1	4	3	2	3	2	3	2	2	2	2	2	2	2	3	3	3	2	2	2	3	2	2	3	2	3	0.50	0.90	0.90	0.90	0.90	0.90	0.90	2.50	0.83	1.67
1	3	-99	2	59	0	-99	2	2	4	3	2	3	2	2	2	1	1	2	2	2	3	4	2	3	3	2	3	3	1	2	1	2	2	2	1	2	2	2	2	0.30	0.70	0.70	0.50	0.70	0.70	0.50	1.83	0.60	3.00
1	1	1	2	39	0	4	1	1	2	1	3	3	3	2	4	4	2	2	2	1	4	4	1	3	2	2	2	2	1	2	2	3	2	2	2	1	1	2	3	0.30	0.90	0.70	0.70	0.50	0.50	0.70	1.92	0.63	2.67
1	1	1	1	49	0	4	1	1	2	3	2	4	2	4	3	2	2	2	4	4	2	3	4	4	2	4	2	2	2	2	3	3	2	3	3	2	3	2	2	0.50	0.70	0.70	0.70	0.50	0.50	0.70	2.42	0.63	2.67
1	1	1	2	48	0	4	1	1	3	1	3	2	3	2	4	2	2	3	2	2	2	2	2	2	1	2	2	2	2	2	2	2	2	1	1	2	2	2	2	0.50	0.90	0.90	0.90	0.90	0.90	0.90	1.83	0.83	2.67
1	1	1	2	37	0	2	1	1	2	2	1	2	2	3	2	1	3	3	1	2	3	3	2	4	2	1	2	2	2	2	1	2	1	2	2	2	1	1	1	0.90	0.90	0.70	0.50	0.90	0.70	0.70	1.58	0.77	2.67
1	1	1	2	31	0	3	1	1	4	2	1	2	2	3	3	4	4	4	2	2	2	4	1	3	3	4	3	1	1	2	1	2	2	2	2	2	2	1	1	0.70	0.50	0.30	0.70	0.90	0.70	0.50	1.58	0.57	3.00
1	1	1	2	52	0	4	1	1	2	3	2	4	2	3	-99	3	2	4	4	4	2	2	2	4	2	2	2	2	1	1	2	-99	3	2	2	1	2	1	3	0.90	0.90	0.70	0.90	0.70	0.90	0.70	1.82	0.80	2.67
1	1	1	2	51	0	4	1	1	2	1	2	2	1	2	3	2	1	3	1	2	4	2	1	4	1	2	1	1	2	2	2	2	1	1	2	2	2	1	1	0.70	0.90	0.90	0.70	0.70	0.70	0.90	1.58	0.80	2.33
1	3	-99	2	50	0	3	2	1	3	3	4	2	2	3	4	3	3	3	2	4	3	4	3	2	3	4	2	2	2	3	3	3	3	4	3	2	3	3	3	0.50	0.50	0.50	0.50	0.70	0.30	0.70	2.83	0.53	2.33
1	1	1	2	37	0	4	1	1	3	1	2	4	2	4	3	3	2	3	2	3	3	5	2	3	3	3	2	1	1	2	1	2	2	1	1	2	2	1	2	0.70	0.70	0.70	0.70	0.90	0.90	0.90	1.50	0.73	2.67
1	1	1	1	48	0	4	1	1	2	2	1	4	3	4	2	2	3	5	3	2	2	3	1	3	3	4	2	3	2	3	1	2	2	4	2	3	2	3	3	0.50	0.50	0.70	0.30	0.50	0.70	0.50	2.50	0.53	2.67
1	1	1	2	56	0	4	1	1	2	2	-99	4	2	2	4	2	2	3	2	2	2	4	2	4	2	2	2	2	2	2	2	2	2	2	2	2	2	1	2	0.90	0.90	0.90	0.90	0.90	0.90	0.90	1.92	0.90	2.67
1	3	-99	2	32	0	1	2	1	3	2	2	3	2	4	2	3	4	4	2	2	3	5	3	4	4	4	2	2	2	2	2	2	2	3	2	3	2	1	1	0.50	0.50	0.50	0.70	0.70	0.70	0.50	2.00	0.57	3.00
1	3	-99	2	32	0	4	2	1	3	3	2	5	2	2	3	2	4	4	4	4	4	4	3	4	4	4	2	2	3	2	3	2	3	3	2	3	2	2	3	0.30	0.50	0.70	0.70	0.70	0.50	0.70	2.50	0.60	3.00
1	3	-99	2	50	0	4	2	1	4	1	4	4	4	4	4	2	3	3	2	4	4	3	2	5	2	3	3	-99	2	2	2	2	2	3	2	3	3	2	2	0.70	0.70	0.70	0.70	0.70	0.70	0.70	2.27	0.70	4.33
1	1	1	2	21	0	2	1	1	1	2	5	5	4	5	3	4	3	2	4	3	4	4	4	5	4	4	4	3	1	2	1	2	2	1	1	2	2	1	1	0.50	0.50	0.70	0.50	0.50	0.70	0.70	1.58	0.57	3.33
1	3	-99	2	42	0	3	2	1	4	4	1	5	4	4	3	2	4	5	4	4	3	2	5	5	3	5	4	1	2	1	3	2	2	2	2	3	3	2	2	0.70	0.70	0.70	0.90	0.70	0.70	0.70	2.08	0.73	4.33
1	1	1	1	21	0	2	1	1	4	1	3	4	2	3	4	4	4	1	3	4	3	3	2	4	1	3	2	2	1	1	1	2	2	2	1	2	2	1	2	0.70	0.90	0.50	0.90	-99.00	0.90	0.70	1.58	0.73	3.33
1	1	1	2	41	0	4	1	1	5	2	2	4	2	1	4	3	4	3	2	5	4	5	1	5	1	4	1	2	1	2	2	3	1	2	2	2	2	1	3	0.90	0.70	0.70	0.70	0.70	0.70	0.90	1.92	0.73	4.00
1	1	1	2	53	0	4	1	1	4	2	3	3	2	2	3	3	1	2	1	1	3	3	1	3	1	1	3	1	1	1	1	2	1	1	1	1	1	1	1	0.70	0.90	0.90	0.70	-99.00	0.90	0.90	1.08	0.80	3.00
1	1	1	2	37	0	4	1	1	2	2	2	4	3	4	3	3	3	2	2	2	4	4	2	4	3	3	3	2	2	2	2	2	2	2	2	2	2	2	2	0.90	0.70	0.70	0.70	0.70	0.70	0.70	2.00	0.73	3.00
1	1	1	2	39	0	4	1	1	2	2	2	3	2	2	3	2	2	3	2	2	3	3	2	4	2	2	2	2	2	2	2	2	2	2	2	2	2	2	2	0.70	0.70	0.70	0.70	0.70	0.70	0.70	2.00	0.70	2.67
1	1	1	1	52	0	4	1	1	4	3	4	4	4	4	3	4	4	3	3	4	4	4	3	4	3	3	4	2	2	2	2	2	2	2	2	2	2	2	2	0.50	0.50	0.50	0.50	0.50	0.50	0.50	2.00	0.50	4.00
1	1	1	2	38	0	4	1	1	5	1	4	5	2	2	4	4	4	3	2	2	4	5	1	4	1	1	3	1	1	1	1	3	2	1	1	2	2	1	2	0.50	0.70	0.70	0.90	0.90	0.90	0.90	1.50	0.73	3.67
1	3	-99	1	40	0	4	2	1	2	2	5	3	2	2	5	4	3	4	2	4	2	3	2	3	2	2	4	2	2	3	2	3	3	2	2	2	2	2	3	0.70	0.50	0.50	0.70	0.70	0.50	0.50	2.33	0.60	2.33
1	1	1	2	40	0	4	1	1	3	2	2	3	3	3	2	2	2	4	2	3	4	4	2	4	4	3	2	2	3	2	2	2	2	2	2	2	2	2	2	0.30	0.50	0.50	0.30	0.50	0.70	0.50	2.08	0.43	3.33
1	3	-99	2	37	0	4	2	1	1	1	2	2	4	1	4	5	3	5	2	5	4	4	1	4	1	4	3	2	2	1	1	1	1	1	1	1	2	1	2	0.50	0.30	0.30	0.70	0.70	0.90	0.70	1.33	0.47	3.00
1	1	1	2	37	0	4	1	1	3	3	5	5	3	5	5	5	4	4	4	5	4	5	4	5	5	4	5	1	2	1	1	1	1	1	1	1	1	1	1	0.70	0.50	0.50	0.70	0.70	0.70	0.70	1.08	0.60	3.67
1	1	1	2	45	1	2	1	1	4	2	4	3	4	3	3	2	2	4	2	4	5	4	2	4	4	3	4	3	3	2	2	2	2	3	3	2	2	2	2	0.30	0.50	0.30	0.50	0.30	0.70	0.30	2.33	0.37	4.00
1	1	1	2	39	0	4	1	1	2	2	2	4	2	2	3	2	3	4	2	2	2	3	2	2	2	2	2	2	2	2	2	2	2	3	2	2	2	2	2	0.90	0.70	0.70	0.70	0.70	0.70	0.70	2.08	0.73	2.00
1	3	-99	2	52	0	2	2	1	2	3	4	2	2	3	4	4	3	4	3	3	2	5	4	4	4	4	4	3	2	2	3	3	2	3	2	3	2	2	2	0.70	0.30	0.30	0.50	0.50	0.50	0.50	2.42	0.43	2.67
1	1	1	2	29	0	4	1	1	1	1	2	4	1	2	2	3	2	4	2	2	4	4	2	2	3	1	1	1	1	1	1	1	1	1	1	1	1	1	1	0.90	0.70	0.70	0.70	0.90	0.90	0.70	1.00	0.77	1.33
1	1	1	2	41	0	4	1	1	2	2	1	3	2	2	2	2	2	2	3	2	2	2	2	3	2	2	2	1	1	2	1	1	1	1	1	1	4	1	1	0.70	0.50	0.70	0.70	0.70	0.70	0.70	1.33	0.67	2.33
1	1	1	2	61	0	2	1	1	2	2	2	4	2	4	3	2	3	2	4	2	4	4	2	3	2	3	2	2	2	3	2	2	2	2	2	2	2	2	2	0.70	0.70	0.70	0.70	0.70	0.70	0.70	2.08	0.70	2.33
1	1	1	2	54	0	4	1	1	2	1	2	4	2	2	2	2	2	3	2	2	2	2	2	3	1	3	2	1	1	1	2	1	1	1	2	1	2	1	2	0.70	0.90	0.90	0.90	0.90	0.90	0.90	1.33	0.87	2.33
1	1	1	2	19	0	2	1	1	2	1	4	2	3	4	4	4	3	2	1	1	3	4	1	4	1	2	2	1	2	1	1	2	1	1	2	2	2	1	1	0.90	0.90	0.90	0.90	-99.00	0.50	0.70	1.42	0.90	3.00
1	1	1	2	58	0	2	1	2	1	1	2	2	1	1	4	1	1	4	1	2	2	2	1	1	1	2	2	2	1	1	1	1	1	3	1	2	1	2	2	0.70	0.70	0.90	0.90	0.90	0.70	0.90	1.50	0.83	1.00
1	3	-99	2	24	1	3	2	1	2	3	3	2	4	4	4	4	4	2	4	4	4	4	2	4	4	4	4	-99	-99	-99	-99	-99	-99	-99	-99	-99	-99	-99	-99	0.70	0.50	0.50	0.70	-99	0.70	0.70	-99	0.60	3.33
1	1	1	1	40	0	4	1	1	4	1	2	5	3	3	3	3	3	3	2	3	4	5	2	3	1	2	1	1	4	1	1	1	1	1	1	1	1	1	1	0.70	0.50	0.50	0.50	0.90	0.90	0.70	1.25	0.60	3.33
1	1	1	2	41	0	3	1	1	2	4	2	4	2	4	3	2	2	3	3	2	2	4	2	2	2	2	2	2	2	2	2	2	2	2	2	2	2	2	2	0.50	0.70	0.70	0.70	0.50	0.50	0.50	2.00	0.63	2.00
1	1	1	2	49	0	4	1	1	3	4	3	5	3	4	3	4	3	4	3	3	3	4	2	4	3	3	2	2	2	2	1	2	2	2	2	2	2	1	3	0.70	0.90	0.90	0.90	0.90	0.70	0.90	1.92	0.87	3.33
1	3	-99	1	54	0	2	2	1	2	1	4	5	3	5	4	3	2	2	2	2	3	3	1	4	1	2	2	2	3	2	1	2	2	1	1	3	2	2	2	0.70	0.70	0.90	0.90	0.70	0.50	0.90	1.92	0.80	3.00
1	1	1	2	26	0	3	1	1	2	2	3	5	2	3	4	3	2	2	2	3	5	5	2	5	2	2	2	2	1	2	1	2	2	2	1	2	2	2	2	0.70	0.90	0.90	0.70	0.50	0.70	0.70	1.75	0.77	3.00
1	1	1	2	38	0	4	1	1	1	2	4	2	2	2	5	4	2	4	2	4	2	3	2	2	2	2	4	2	1	3	2	3	2	2	2	2	2	1	2	0.70	0.70	0.70	0.70	0.90	0.70	0.90	2.00	0.73	1.67
1	1	1	2	50	1	4	1	1	2	2	2	4	3	4	2	3	2	2	2	2	2	4	2	3	2	2	2	2	2	2	2	2	2	2	2	2	2	2	3	0.70	0.90	0.70	0.70	0.50	0.70	0.70	2.08	0.70	2.67
1	1	1	2	42	1	4	1	1	3	3	3	4	2	4	3	3	2	4	3	2	3	3	3	4	2	4	4	2	1	2	2	2	2	2	2	2	2	2	2	0.30	0.70	0.50	0.70	-99.00	0.70	0.50	1.92	0.57	3.00
1	1	1	2	31	1	4	1	1	1	1	4	4	3	3	3	3	2	3	2	3	3	3	2	3	1	1	2	3	3	3	3	2	2	4	3	4	3	4	2	0.70	0.70	0.70	0.70	0.90	0.90	0.90	3.00	0.73	2.33
1	1	1	1	63	0	4	1	1	2	2	2	5	4	4	3	2	2	2	2	4	4	3	2	4	2	1	2	2	2	3	2	2	2	2	2	2	3	3	2	0.70	0.90	0.90	0.90	0.70	0.70	0.90	2.25	0.83	3.33
1	1	1	2	34	0	4	1	1	1	5	3	4	1	4	1	3	3	5	5	5	3	4	2	4	5	4	4	4	2	3	1	3	2	3	1	2	3	3	4	0.70	0.70	0.50	0.70	0.50	0.70	0.70	2.58	0.60	2.00
1	1	1	2	62	0	3	1	1	1	1	2	5	2	3	4	2	3	4	1	1	4	4	2	4	2	1	2	1	1	4	1	2	2	1	2	1	1	1	1	0.90	0.90	0.90	0.90	0.90	0.90	0.70	1.50	0.90	2.33
1	1	1	1	47	0	4	1	1	3	1	2	5	2	2	4	1	4	2	2	4	3	4	2	4	1	3	2	1	1	1	2	2	1	1	2	2	2	1	2	0.50	0.70	0.70	0.90	0.90	0.70	0.70	1.50	0.73	3.00
1	1	1	2	47	0	2	1	1	3	1	1	5	4	4	3	1	2	2	2	1	5	5	1	5	1	1	2	1	1	1	1	1	1	1	1	1	1	1	1	0.50	0.70	0.90	0.90	0.90	0.90	0.90	1.00	0.80	4.00
1	1	1	1	69	1	2	1	1	2	1	3	2	2	2	3	3	3	2	2	1	2	2	2	2	1	2	2	2	2	-99	2	3	2	2	2	2	2	2	2	0.70	0.70	0.90	0.90	-99.00	0.90	0.70	2.09	0.83	2.00
1	1	1	2	53	1	4	1	1	2	2	1	4	1	4	2	2	2	2	3	2	2	4	1	4	2	2	2	2	1	1	1	1	1	2	2	2	2	2	2	0.50	0.90	0.90	0.90	-99.00	0.90	0.90	1.58	0.83	2.33
1	1	1	2	21	0	2	1	1	4	2	2	4	4	4	3	3	4	2	2	2	2	4	1	4	4	2	3	2	2	2	3	2	1	2	2	2	2	2	2	0.70	0.70	0.50	0.70	-99.00	0.70	0.70	2.00	0.63	4.00
1	1	1	2	38	0	4	1	1	4	1	3	5	4	4	3	4	3	4	4	3	3	4	1	2	2	2	3	2	2	-99	3	2	2	-99	2	2	2	1	2	0.10	0.70	0.70	0.90	-99.00	-99.00	0.50	2.00	0.67	3.33
1	1	1	1	52	0	3	1	1	3	1	2	2	2	3	5	3	3	2	1	2	3	3	2	3	2	3	2	2	2	3	1	2	2	1	2	2	2	2	2	0.70	0.70	0.70	0.70	0.70	0.90	0.90	1.92	0.70	2.67
1	1	1	2	46	0	2	1	1	2	4	4	4	4	4	5	4	3	4	2	4	4	4	2	4	4	4	4	3	3	3	3	3	3	3	3	3	3	3	3	0.50	0.50	0.50	0.50	0.50	0.50	0.50	3.00	0.50	3.33
1	1	1	2	49	0	4	1	1	4	1	1	4	2	3	3	3	1	4	1	1	4	4	1	2	2	2	1	2	1	1	1	1	1	2	1	2	2	3	2	0.70	0.70	0.70	0.70	0.30	0.70	0.70	1.58	0.63	2.67
1	1	1	2	45	0	4	1	1	2	2	2	3	4	2	3	3	2	2	2	2	3	4	3	3	2	2	2	1	1	1	2	1	1	2	2	1	1	1	2	0.30	0.70	0.70	0.70	0.90	0.90	0.70	1.33	0.67	3.00
1	1	1	2	63	0	3	1	1	4	2	1	5	3	4	3	2	3	2	2	2	3	4	2	4	2	3	2	2	2	2	2	2	2	1	2	2	2	1	2	0.70	0.90	0.90	0.90	0.70	0.90	0.90	1.83	0.83	3.67
1	3	-99	2	18	0	2	2	1	5	2	3	4	4	3	3	4	3	3	3	5	3	4	2	4	3	5	3	3	2	2	3	3	2	4	3	3	3	2	2	0.10	0.50	0.70	0.70	0.90	0.70	0.70	2.67	0.60	4.33
1	3	-99	2	26	0	4	2	1	5	4	5	4	3	5	5	5	5	5	5	5	3	3	5	4	4	4	4	2	2	3	4	3	2	4	4	3	3	3	3	0.50	0.30	0.30	0.30	0.70	0.50	0.50	3.00	0.40	4.00
1	1	1	2	50	0	2	1	1	4	2	2	4	3	3	3	2	2	3	3	2	3	4	2	4	1	2	2	2	2	2	2	2	2	2	2	2	2	2	2	0.50	0.90	0.70	0.90	0.90	0.90	0.70	2.00	0.77	3.67
1	1	1	1	31	1	1	1	1	2	1	4	3	3	4	3	4	3	4	1	5	4	5	1	3	4	4	3	2	1	1	1	3	1	4	2	2	2	1	2	0.70	0.30	0.50	0.50	-99.00	0.50	0.50	1.83	0.50	2.67
1	3	-99	2	24	0	4	2	1	2	2	4	5	2	2	4	3	2	4	4	2	4	2	3	2	3	2	3	-99	-99	-99	-99	-99	-99	-99	-99	-99	-99	-99	-99	0.90	0.70	0.90	0.70	0.90	0.70	0.90	-99	0.83	2.00
1	1	1	2	57	1	4	1	1	2	1	1	3	1	1	3	2	1	5	1	2	3	4	1	3	1	1	1	1	1	1	1	2	2	1	1	1	2	1	2	0.70	0.90	0.90	0.90	-99.00	0.90	0.90	1.33	0.87	2.00
1	3	-99	2	62	0	3	2	1	2	1	1	2	2	1	5	1	1	4	1	1	2	2	1	2	1	2	2	4	1	1	2	2	2	2	2	2	2	2	2	0.50	0.70	0.70	0.70	-99.00	0.90	0.70	2.00	0.67	2.00
1	1	1	2	32	0	2	1	1	3	1	1	3	2	1	3	2	2	3	1	2	2	2	1	2	1	4	1	1	1	1	1	1	1	1	1	1	1	1	1	0.90	0.90	0.70	0.70	0.90	0.90	0.90	1.00	0.80	2.33
1	3	-99	2	50	0	2	2	1	4	4	2	3	4	4	2	2	2	5	4	4	4	2	2	4	4	3	2	-99	-99	-99	-99	-99	-99	-99	-99	-99	-99	-99	-99	0.90	0.90	0.90	0.90	0.90	0.50	0.90	-99	0.90	4.00
1	1	1	2	42	0	4	1	1	4	4	2	5	2	4	2	1	4	2	4	2	5	5	1	5	1	2	1	3	1	4	1	1	1	1	1	4	3	3	2	0.90	0.90	0.70	0.90	0.70	0.90	0.90	2.08	0.80	3.67
1	1	1	1	45	0	4	1	1	2	2	1	5	5	5	2	2	2	2	2	2	2	2	2	4	2	2	1	2	1	1	1	1	1	2	2	2	2	1	1	0.90	0.70	0.70	0.90	0.90	0.90	0.70	1.42	0.80	3.67
1	1	1	2	34	0	4	1	1	3	1	4	4	3	2	4	2	3	4	2	3	4	4	1	3	1	2	1	2	1	2	1	2	1	1	1	2	1	1	1	0.30	0.70	0.90	0.90	0.70	0.90	0.90	1.33	0.73	3.00
1	1	1	2	51	1	4	1	1	3	2	2	4	2	4	3	3	4	3	2	4	4	3	2	4	4	4	3	2	2	2	2	2	2	2	2	2	2	2	2	0.90	0.90	0.90	0.70	-99.00	0.70	0.70	2.00	0.83	3.00
1	1	1	2	32	0	4	1	1	4	4	2	4	2	4	2	2	2	3	3	2	5	5	2	4	2	3	2	2	2	2	3	2	2	3	2	2	2	4	2	0.50	0.50	0.50	0.70	0.30	0.50	0.50	2.33	0.50	3.33
1	1	1	2	32	1	1	1	1	4	2	5	3	4	4	5	5	5	5	2	5	3	2	3	5	4	4	5	4	2	4	4	4	3	4	4	4	3	4	4	0.30	0.50	0.30	0.30	-99.00	0.50	0.50	3.67	0.33	4.33
1	1	1	2	62	0	3	1	1	1	1	1	4	-99	2	2	1	2	4	1	2	5	5	2	5	2	1	1	1	1	2	2	2	2	1	1	1	2	1	2	0.90	0.90	0.90	0.90	0.90	0.90	0.90	1.50	0.90	3.00
1	1	1	2	54	0	4	1	1	2	1	1	3	2	2	2	2	2	3	2	2	2	4	2	4	2	3	2	3	2	3	3	3	2	2	2	3	3	2	2	0.70	0.70	0.70	0.70	0.50	0.70	0.50	2.50	0.67	2.67
1	1	1	2	58	1	4	1	1	4	1	1	3	2	4	3	1	2	3	1	1	4	4	1	4	1	3	2	4	1	2	2	2	2	-99	2	2	2	1	2	0.70	0.50	0.70	0.90	0.90	0.90	0.70	2.00	0.73	3.33
1	1	1	1	18	0	2	1	1	4	3	2	3	2	-99	2	5	1	4	4	5	4	3	3	5	3	3	5	2	3	2	2	3	3	3	3	2	1	2	2	0.70	0.30	0.30	0.30	-99.00	0.50	0.30	2.33	0.37	3.67
1	1	1	2	36	0	4	1	1	4	2	2	4	2	4	2	2	2	2	2	2	2	3	2	3	2	2	2	4	3	3	3	2	3	2	2	3	1	4	1	0.50	0.50	0.70	0.70	0.30	0.70	0.70	2.58	0.57	3.00
1	1	1	1	51	0	4	1	1	1	3	1	5	2	3	3	1	1	1	3	2	4	4	3	2	1	1	1	1	1	1	1	1	1	1	1	1	1	1	1	0.70	0.90	0.90	0.70	0.50	0.90	0.90	1.00	0.77	1.67
1	1	1	2	50	0	3	1	1	3	1	3	5	3	2	2	2	4	2	2	2	3	4	1	3	1	1	2	2	1	2	1	1	1	1	1	1	1	1	1	0.70	0.90	0.90	0.70	0.90	0.90	0.90	1.17	0.83	3.00
1	3	-99	2	55	0	4	2	1	3	1	1	4	3	5	2	1	3	4	3	2	4	4	3	4	1	3	1	1	2	3	1	2	3	2	1	1	1	1	1	0.70	0.70	0.70	0.90	-99.00	0.90	0.90	1.58	0.77	3.33
1	1	1	2	39	0	3	1	1	4	1	2	5	2	3	3	3	3	4	3	4	5	4	2	4	3	4	3	1	2	2	1	1	1	2	1	1	1	1	2	0.30	0.70	0.70	0.70	0.70	0.70	0.70	1.33	0.63	3.33
1	1	1	2	22	0	2	1	1	3	2	4	3	3	2	4	4	4	2	2	4	2	3	2	4	2	3	4	2	2	3	2	2	2	2	2	2	2	2	3	0.70	0.70	0.50	0.70	-99.00	0.70	0.70	2.17	0.63	3.33
1	1	1	2	55	0	2	1	1	3	2	2	4	2	5	4	2	2	4	2	2	5	2	2	4	2	2	2	2	2	-99	2	2	2	2	2	2	2	2	2	0.50	0.70	0.70	0.10	-99.00	0.70	0.70	2.00	0.47	3.00
1	1	1	2	48	0	2	1	1	2	1	2	3	2	2	4	2	2	4	2	2	2	2	2	4	2	2	2	3	3	2	2	2	2	2	2	2	2	3	3	0.70	0.50	0.70	0.90	0.30	0.90	0.50	2.33	0.63	2.67
1	1	1	2	60	0	2	1	1	4	3	4	4	3	4	4	3	3	4	2	4	3	4	2	2	2	2	3	2	3	2	2	2	2	2	2	2	2	2	2	0.70	0.70	0.70	0.70	0.70	0.70	0.70	2.08	0.70	3.00
1	1	1	2	53	0	4	1	1	1	1	1	4	1	1	3	1	1	5	1	4	4	4	2	2	1	1	1	2	3	2	1	1	1	2	1	2	2	1	1	0.70	0.70	0.90	0.70	0.90	0.50	0.70	1.58	0.80	1.33
1	1	1	2	50	0	4	1	1	5	4	4	4	4	4	4	4	4	4	4	4	4	4	3	4	4	4	3	2	3	3	3	3	2	3	3	3	3	2	3	0.30	0.50	0.50	0.50	0.30	0.70	0.30	2.75	0.43	4.33
1	1	1	2	43	0	2	1	1	3	1	2	3	3	1	2	2	4	4	2	2	4	5	2	3	2	2	2	2	2	1	1	2	1	1	2	2	2	1	2	0.70	0.70	0.50	0.70	0.70	0.70	0.70	1.58	0.63	3.00
1	1	1	2	53	1	3	1	1	3	1	2	4	3	3	2	3	2	4	2	2	4	4	1	4	3	3	2	1	2	1	1	1	1	2	1	2	2	1	2	0.50	0.70	0.70	0.90	0.90	0.90	0.70	1.42	0.73	3.33
1	1	1	1	30	0	2	1	1	2	3	2	3	4	4	2	2	3	2	3	4	3	4	2	3	2	2	4	3	2	2	2	2	2	2	2	2	2	3	2	0.70	0.70	0.70	0.70	0.70	0.70	0.70	2.17	0.70	3.00
1	1	1	2	66	0	4	1	1	3	1	2	3	2	2	4	3	2	3	1	2	2	3	1	3	1	1	1	1	1	2	1	2	2	2	2	1	2	1	2	0.70	0.70	0.70	0.70	0.90	0.90	0.90	1.58	0.73	2.67
1	3	-99	2	53	1	2	2	1	3	1	2	4	4	5	1	3	1	3	2	2	5	5	1	5	4	4	4	1	-99	2	4	3	2	3	2	3	2	3	3	0.30	0.30	0.50	0.70	-99.00	0.70	0.50	2.55	0.50	4.00
1	1	1	2	58	1	2	1	2	3	4	4	4	4	4	5	5	5	3	3	4	5	5	3	5	5	5	4	1	3	2	2	3	3	3	2	3	3	2	3	0.70	0.30	0.30	0.50	-99.00	0.90	0.30	2.50	0.43	4.00
1	1	1	2	50	1	2	1	1	3	1	1	3	1	3	2	1	4	4	1	2	4	4	1	3	1	2	1	2	2	2	2	2	2	2	2	2	2	2	2	0.90	0.90	0.90	0.90	-99.00	0.70	0.90	2.00	0.90	2.33
1	1	1	2	40	1	4	1	1	2	1	2	4	2	2	2	2	2	3	3	1	2	3	1	3	2	1	3	1	1	2	1	3	2	1	1	1	1	1	3	0.70	0.90	0.90	0.90	-99.00	0.90	0.70	1.50	0.87	2.33
1	1	1	2	50	0	2	1	1	4	3	1	2	3	3	2	2	2	4	2	2	3	3	2	4	3	2	2	2	2	3	2	3	2	2	2	2	2	2	2	0.50	0.70	0.90	0.90	0.90	0.70	0.70	2.17	0.80	3.67
1	1	1	2	43	0	4	1	1	2	2	2	3	2	3	4	3	2	2	2	2	3	4	2	3	2	2	2	2	2	2	2	2	2	2	2	2	2	2	2	0.70	0.70	0.70	0.70	0.90	0.70	0.70	2.00	0.73	2.33
1	1	1	2	62	0	4	1	1	3	1	2	4	2	3	3	2	3	3	2	2	3	3	3	3	2	2	3	1	2	2	2	3	2	2	2	2	2	1	2	0.90	0.90	0.90	0.90	0.90	0.70	0.90	1.92	0.90	2.67
1	1	1	2	58	1	4	1	1	2	2	2	3	-99	2	3	3	3	3	2	3	3	4	1	3	1	2	2	1	1	2	1	1	2	-99	3	2	1	2	2	0.70	0.70	0.70	0.90	-99.00	0.90	0.70	1.64	0.77	2.50
1	3	-99	2	51	0	4	2	1	3	1	-99	4	-99	4	-99	3	-99	2	1	4	4	4	2	4	3	1	3	2	2	2	2	2	2	3	2	2	2	2	2	0.50	-99.00	0.70	0.90	0.90	0.50	0.70	2.08	0.70	3.50
1	1	1	2	32	0	4	1	1	3	2	2	4	3	3	4	3	2	3	2	2	3	5	2	3	1	3	2	1	1	2	2	2	2	1	2	2	2	1	2	0.90	0.90	0.70	0.90	0.90	0.70	0.90	1.67	0.83	3.00
1	1	1	2	44	0	2	1	1	2	3	3	4	2	4	3	2	2	4	2	2	5	5	3	4	2	2	3	1	2	1	2	2	2	1	2	1	1	1	2	0.70	0.70	0.70	0.70	0.70	0.70	0.70	1.50	0.70	2.67
1	3	-99	1	46	0	3	2	1	2	3	2	4	2	4	4	3	2	3	3	4	3	3	3	4	2	3	3	2	2	2	2	2	2	2	2	2	2	2	2	0.70	0.70	0.70	0.70	0.70	0.70	0.70	2.00	0.70	2.67
1	1	1	2	50	0	4	1	1	4	2	1	5	2	2	2	1	2	4	3	2	4	4	1	3	2	2	2	3	1	1	1	2	1	2	1	3	2	1	1	0.50	0.70	0.70	0.90	0.90	0.90	0.90	1.58	0.73	3.00
1	1	1	2	48	0	3	1	1	2	3	1	3	2	3	2	2	2	5	2	3	4	4	2	4	4	2	2	2	1	1	1	2	1	2	2	1	2	1	1	0.50	0.50	0.50	0.90	0.90	0.90	0.70	1.42	0.63	2.67
1	1	1	2	64	0	4	1	1	4	2	3	5	3	4	3	3	4	2	2	3	4	4	1	4	3	3	3	1	2	2	1	2	1	1	1	1	1	1	2	0.70	0.90	0.90	0.70	0.90	0.90	0.70	1.33	0.83	3.67
1	1	1	2	36	1	4	1	1	2	1	1	2	1	1	2	1	1	1	1	1	2	2	1	4	1	1	2	2	2	1	2	2	2	2	2	2	2	2	2	0.70	0.70	0.70	0.90	-99.00	0.70	0.70	1.92	0.77	2.33
1	1	1	2	73	1	4	1	1	4	2	4	4	2	2	5	3	2	2	4	3	4	4	3	2	2	1	2	1	2	1	2	1	1	2	2	2	1	1	2	0.50	0.90	0.50	0.70	-99.00	0.90	0.90	1.50	0.63	2.67
1	1	1	1	21	0	2	1	1	3	2	3	3	4	2	4	3	3	3	2	4	3	5	1	4	1	2	3	1	1	1	1	1	1	1	1	1	1	1	1	0.90	0.70	0.90	0.70	0.90	0.90	0.90	1.00	0.83	3.67
1	1	1	2	34	0	4	1	1	2	4	2	4	2	3	4	4	2	3	4	2	3	3	3	4	2	4	3	2	1	3	2	2	2	2	2	2	2	1	2	0.50	0.50	0.50	0.70	0.70	0.70	0.70	1.92	0.57	2.67
1	1	1	2	68	0	4	1	1	3	2	2	4	3	2	3	3	3	4	2	2	3	3	1	3	2	2	2	2	2	2	-99	2	2	3	2	2	2	2	2	0.90	0.70	0.90	0.90	0.90	0.70	0.70	2.09	0.87	3.00
1	1	1	1	52	0	2	1	1	3	1	2	4	3	2	2	1	2	4	2	2	2	3	2	3	2	2	2	2	3	2	2	2	2	2	2	2	2	2	2	0.70	0.90	0.90	0.90	0.90	0.90	0.90	2.08	0.87	3.00
1	1	1	2	46	0	4	1	1	5	1	2	5	5	5	3	3	4	2	2	4	5	5	1	4	2	1	2	1	1	1	1	1	1	1	1	1	1	1	1	0.70	0.70	0.70	0.90	0.90	0.90	0.90	1.00	0.77	4.67
1	1	1	2	42	0	4	1	1	2	2	3	2	3	3	4	3	2	2	1	3	3	5	2	1	1	1	2	2	3	2	4	3	1	1	1	2	2	2	2	0.90	0.70	0.90	0.70	0.70	0.70	0.70	2.08	0.80	2.00
1	1	1	2	49	0	4	1	1	3	2	2	4	3	2	2	2	2	3	2	2	4	4	2	4	2	2	2	2	2	2	1	1	1	2	3	-99	2	2	2	0.90	0.90	0.70	0.70	0.70	0.70	0.70	1.82	0.77	3.33
1	1	1	2	50	0	3	1	1	3	4	1	4	4	4	2	2	2	3	4	4	3	4	4	5	4	5	3	3	2	3	2	2	2	3	2	3	3	3	2	0.70	0.70	0.70	0.70	0.50	0.90	0.70	2.50	0.67	4.00
1	3	-99	2	33	0	4	2	1	4	1	2	5	2	4	2	2	2	4	4	4	5	5	3	4	3	5	4	3	2	3	2	3	2	2	2	2	2	1	2	0.70	0.70	0.90	0.90	0.90	0.90	0.90	2.17	0.83	3.33
1	3	-99	2	37	0	4	2	1	5	4	5	4	5	4	5	4	5	4	3	4	4	5	3	4	3	3	3	2	2	3	2	3	2	2	3	3	2	3	3	0.70	0.90	0.70	0.70	0.50	0.50	0.70	2.50	0.70	4.67
1	1	1	2	42	0	4	1	1	3	1	2	4	3	3	3	4	3	4	3	3	4	4	2	4	3	4	3	2	2	2	2	2	2	3	2	2	2	2	2	0.50	0.50	0.50	0.50	0.70	0.50	0.50	2.08	0.53	3.33
1	1	1	2	34	0	3	1	1	4	2	2	4	2	2	4	2	2	4	2	2	3	4	3	3	2	2	2	2	1	2	1	2	2	1	1	1	2	1	2	0.50	0.90	0.70	0.70	0.90	0.90	0.70	1.50	0.73	3.00
1	1	1	1	21	0	2	1	1	4	1	5	4	4	4	4	4	4	5	2	4	2	3	3	4	4	2	4	2	2	3	3	2	3	1	2	3	3	4	4	0.30	0.30	0.30	0.10	0.70	0.70	0.50	2.67	0.33	4.00
1	3	-99	1	64	0	4	2	1	2	1	2	3	2	2	4	3	3	4	1	3	3	3	2	3	1	2	2	2	2	2	2	2	2	2	2	2	2	2	2	0.70	0.70	0.70	0.70	0.90	0.50	0.70	2.00	0.73	2.33
1	1	1	1	36	0	2	1	1	4	1	2	4	2	2	4	2	3	3	1	3	5	5	1	5	1	1	1	2	1	1	1	2	2	1	1	1	1	1	4	0.90	0.90	0.90	0.90	0.90	0.70	0.90	1.50	0.90	3.67
1	1	1	2	59	0	4	1	1	2	1	2	2	1	1	4	2	1	4	1	2	3	4	1	3	2	3	2	2	1	2	2	2	2	1	2	2	2	4	2	0.70	0.50	0.70	0.70	0.90	0.90	0.90	2.00	0.70	2.00
1	1	1	2	39	0	2	1	1	4	2	2	5	1	4	2	2	2	4	4	4	4	4	4	4	5	4	4	3	2	2	2	2	2	2	2	3	2	2	2	0.70	0.30	0.50	0.50	0.70	0.10	0.50	2.17	0.53	3.00
1	1	1	2	48	0	4	1	1	3	2	2	4	2	2	3	3	2	4	2	2	3	3	2	4	2	3	3	2	2	2	1	2	2	1	1	1	1	1	1	0.70	0.70	0.70	0.70	0.90	0.90	0.90	1.42	0.73	3.00
1	1	1	2	29	0	4	1	1	2	2	4	2	2	2	4	2	3	2	2	2	3	4	2	2	2	2	2	1	2	2	2	2	2	1	2	2	2	2	2	0.70	0.90	0.70	0.70	0.70	0.70	0.90	1.83	0.73	2.00
1	3	-99	1	48	0	4	2	1	3	4	1	4	3	3	2	2	4	2	3	3	4	4	4	4	2	2	1	2	2	3	1	2	2	2	1	1	1	2	2	0.70	0.90	0.70	0.70	0.70	0.70	0.90	1.75	0.73	3.33
1	3	-99	2	32	0	4	2	1	2	2	2	4	2	2	2	3	2	3	2	2	4	4	2	4	4	3	3	3	2	1	1	1	1	2	2	3	2	2	1	0.70	0.50	0.50	0.50	0.50	0.50	0.50	1.75	0.53	2.67
1	1	1	2	50	1	4	1	1	4	3	4	4	4	4	1	1	2	1	4	2	3	3	1	3	2	2	1	2	3	3	1	3	3	3	1	1	4	2	2	0.50	0.70	0.70	0.70	-99.00	0.70	0.70	2.33	0.67	3.67
1	3	-99	2	53	1	1	2	1	2	2	1	2	2	4	2	3	5	2	2	2	2	4	3	4	2	4	3	2	2	4	2	2	2	3	2	2	2	2	2	0.30	0.70	0.70	0.70	-99.00	0.70	0.50	2.25	0.63	2.67
1	1	1	1	61	0	4	1	1	1	1	2	1	2	2	4	2	1	3	1	2	2	2	2	2	2	2	2	4	3	4	2	2	2	2	2	2	2	2	2	0.70	0.90	0.90	0.90	0.70	0.70	0.70	2.42	0.83	1.67
1	1	1	2	36	0	4	1	1	2	2	3	4	2	2	3	2	3	5	4	3	4	4	1	4	4	2	2	2	2	2	2	2	2	3	2	2	2	2	1	0.50	0.70	0.70	0.70	0.50	0.70	0.70	2.00	0.63	2.67
1	1	1	2	50	0	4	1	1	2	1	1	4	2	2	2	1	2	4	2	1	2	3	1	2	2	2	2	4	1	1	1	1	1	1	1	1	1	1	1	0.70	0.70	0.70	0.90	-99.00	0.90	0.90	1.25	0.77	2.00
1	3	-99	2	61	0	4	2	1	3	2	1	3	2	2	3	2	2	3	1	2	3	4	2	3	2	2	1	1	1	1	1	1	1	2	1	1	1	1	2	0.90	0.90	0.90	0.90	0.90	0.90	0.90	1.17	0.90	2.67
1	1	1	1	46	0	4	1	1	2	1	2	3	2	2	3	2	2	3	1	2	3	2	1	3	1	2	2	2	1	2	1	2	2	2	1	2	2	2	2	0.90	0.90	0.90	0.90	0.70	0.70	0.90	1.75	0.87	2.33
1	1	1	2	25	1	4	1	1	2	1	4	4	4	1	5	4	4	5	5	3	4	4	1	4	3	1	4	1	1	1	1	1	1	3	1	1	1	1	2	0.70	0.30	0.70	0.90	-99.00	0.90	0.50	1.25	0.70	3.33
1	1	1	1	49	0	4	1	1	2	1	2	3	2	2	2	2	2	3	2	2	3	3	1	3	2	4	2	2	2	2	2	1	2	2	2	2	2	3	2	0.50	0.50	0.70	0.70	0.50	0.90	0.70	2.00	0.60	2.33
1	3	-99	2	50	1	2	2	1	4	1	4	3	4	3	5	4	4	4	3	4	4	4	2	4	3	4	5	3	3	2	3	3	3	3	2	3	2	2	2	0.30	0.30	0.10	0.30	-99.00	0.50	0.10	2.58	0.23	4.00
1	1	1	2	46	0	4	1	1	1	1	1	2	1	4	2	2	2	4	2	2	3	4	1	3	2	2	1	2	1	2	2	3	2	4	1	4	1	4	1	0.90	0.90	0.90	0.90	0.90	0.90	0.90	2.25	0.90	1.67
1	1	1	2	56	0	4	1	2	2	4	4	3	3	3	5	4	4	4	4	4	3	4	3	4	3	4	3	3	3	3	3	3	3	3	3	3	3	3	3	0.70	0.50	0.50	0.50	0.50	0.50	0.50	3.00	0.53	3.00
1	1	1	2	39	0	3	1	1	3	1	2	2	2	3	2	1	2	2	2	1	3	3	1	4	1	1	1	1	1	1	1	1	4	1	1	3	1	1	1	0.90	0.70	0.70	0.90	0.70	0.90	0.90	1.42	0.77	3.00
1	1	1	2	54	0	4	1	2	3	2	2	2	2	2	4	2	2	4	2	2	3	2	2	2	2	2	3	2	2	1	2	2	1	4	1	2	2	1	1	0.50	0.90	0.90	0.90	0.90	0.90	0.90	1.75	0.83	2.33
1	1	1	2	59	0	4	1	1	2	2	2	2	2	2	2	2	2	4	2	2	2	4	2	2	2	2	2	2	2	2	2	2	2	2	2	2	2	2	2	0.70	0.70	0.70	0.90	0.70	0.70	0.70	2.00	0.73	2.00
1	1	1	2	65	0	4	1	1	2	1	1	4	3	3	2	3	1	2	2	2	2	4	1	2	1	1	1	1	2	1	1	2	2	4	1	1	2	1	1	0.50	0.70	0.70	0.90	0.90	0.90	0.30	1.58	0.73	2.33
1	1	1	1	55	1	4	1	1	3	3	3	4	3	4	3	3	4	3	3	4	4	5	2	3	2	1	3	2	1	1	1	2	1	1	1	2	1	1	2	0.90	0.90	0.90	0.70	0.90	0.90	0.90	1.33	0.87	3.00
1	1	1	2	51	0	4	1	1	2	1	2	2	2	2	4	3	3	2	2	2	2	-99	1	1	1	1	3	2	2	3	2	2	2	4	3	3	1	4	3	0.70	0.90	0.90	0.90	0.90	0.70	0.70	2.58	0.87	1.67
1	1	1	2	56	0	4	1	1	3	2	2	5	2	4	3	2	3	4	2	2	3	5	2	4	2	3	2	1	2	1	1	1	1	1	1	1	1	1	1	0.90	0.70	0.70	0.90	0.90	0.90	0.70	1.08	0.80	3.00
1	1	1	1	50	0	3	1	1	4	2	2	4	3	4	5	3	2	4	3	4	3	4	3	3	3	3	3	2	2	2	1	2	2	2	1	2	2	1	2	0.50	0.70	0.70	0.70	0.70	0.70	0.70	1.75	0.67	3.33
1	1	1	2	45	0	2	1	1	4	4	2	4	2	4	2	2	2	2	2	2	4	4	2	2	2	2	2	1	2	2	2	2	2	2	2	2	2	1	2	0.90	0.70	0.90	0.90	0.90	0.90	0.90	1.83	0.87	2.67
1	1	1	2	42	0	3	1	1	4	1	1	5	4	4	1	1	1	2	2	1	5	5	1	5	1	1	1	1	1	1	1	1	1	1	1	1	2	1	2	0.90	0.90	0.90	0.90	0.90	0.50	0.90	1.17	0.90	4.33
1	1	1	1	41	0	3	1	1	2	3	3	3	4	2	4	2	4	4	2	2	2	2	2	3	2	2	2	3	2	2	1	2	1	2	2	2	2	2	3	0.50	0.70	0.70	0.50	0.90	0.70	0.70	2.00	0.67	3.00
1	1	1	2	49	1	4	1	1	2	2	2	4	2	2	5	2	1	3	2	2	2	3	2	3	2	-99	2	2	2	3	2	3	2	2	2	3	2	2	2	0.70	0.70	0.70	0.70	-99.00	0.90	0.70	2.25	0.70	2.33
1	1	1	2	41	0	4	1	1	2	2	3	4	2	2	4	2	2	3	4	4	4	4	3	3	4	2	2	4	1	2	2	1	4	2	3	1	1	2	2	0.70	0.70	0.50	0.50	0.50	0.70	0.70	2.08	0.57	2.33
1	1	1	1	43	0	4	1	1	1	1	1	4	1	1	2	1	1	1	1	1	2	2	1	1	1	1	1	4	1	1	1	1	1	1	1	1	1	1	1	0.90	0.90	0.90	0.90	0.70	0.90	0.90	1.25	0.87	1.00
1	1	1	2	39	0	4	1	1	2	1	4	4	2	3	4	4	4	2	2	2	2	3	2	3	2	3	4	1	1	2	2	2	2	2	2	2	1	1	1	0.70	0.70	0.70	0.70	0.90	0.90	0.90	1.58	0.73	2.33
1	1	1	2	60	1	3	1	1	2	1	2	3	1	1	3	2	2	3	2	2	3	3	1	2	2	2	2	2	2	2	2	3	3	2	1	2	3	2	2	0.70	0.90	0.70	0.90	-99.00	0.70	0.90	2.17	0.80	1.67
1	1	1	2	45	0	4	1	1	4	2	2	4	2	4	3	3	2	2	4	2	3	4	1	3	2	2	2	3	2	2	3	3	2	2	2	2	3	2	3	0.70	0.90	0.70	0.90	0.70	0.70	0.70	2.42	0.77	3.00
1	1	1	1	40	0	4	1	1	2	1	2	4	1	4	3	3	1	3	1	2	2	3	1	2	1	1	2	1	2	1	1	1	1	1	1	1	1	1	1	0.70	0.90	0.90	0.90	0.90	0.90	0.90	1.08	0.87	1.67
1	1	1	1	46	1	4	1	1	3	1	2	4	2	1	4	2	2	4	2	2	2	3	2	4	2	4	2	3	3	2	2	1	2	3	2	2	2	2	2	0.50	0.30	0.30	0.70	-99.00	0.50	0.30	2.17	0.47	3.00
1	3	-99	1	47	0	2	2	1	4	2	1	4	2	4	3	2	3	4	2	2	4	4	2	3	1	1	1	2	2	2	1	2	2	2	2	2	2	2	2	0.90	0.70	0.70	0.70	0.50	0.70	0.70	1.92	0.70	3.00
1	1	1	1	30	0	2	1	1	2	4	3	4	3	4	3	3	4	5	4	4	3	4	3	3	2	2	2	3	2	2	1	2	1	2	1	3	2	4	2	0.50	0.70	0.70	0.70	0.50	0.70	0.70	2.08	0.63	2.67
1	3	-99	2	56	1	2	2	1	4	1	4	4	3	4	3	4	4	4	2	4	4	4	1	4	4	3	4	3	3	2	3	2	3	3	3	3	3	2	2	0.30	0.50	0.70	0.90	0.30	0.50	0.50	2.67	0.57	3.67
1	1	1	1	45	0	4	1	1	5	3	2	4	3	3	2	2	3	3	3	4	3	3	3	4	2	2	2	2	2	2	1	2	2	1	2	2	2	2	-99	0.70	0.90	0.90	0.70	0.50	0.50	0.90	1.82	0.77	4.00
1	1	1	2	48	0	4	1	1	4	2	2	3	2	1	3	3	3	3	2	3	3	4	3	3	1	1	3	1	2	2	2	2	2	2	2	2	2	2	2	0.70	0.70	0.70	0.70	0.50	0.70	0.70	1.92	0.67	3.00
1	1	1	2	38	0	3	1	1	2	2	2	4	1	3	2	2	4	4	3	4	4	2	1	4	4	5	4	2	1	1	2	2	2	2	2	1	2	2	2	0.30	0.50	0.70	0.70	0.70	0.70	0.30	1.75	0.60	2.33
1	1	1	2	55	1	4	1	1	2	1	2	1	3	2	5	1	1	2	1	1	4	4	1	1	1	1	1	2	1	1	1	2	1	2	1	2	2	1	1	0.90	0.90	0.90	0.90	-99.00	0.90	0.70	1.42	0.90	2.00
1	1	1	2	54	0	4	1	1	4	2	2	3	2	2	2	2	2	3	2	2	3	4	2	4	2	1	3	2	2	2	1	2	1	2	1	1	1	1	1	0.90	0.90	0.90	0.70	0.90	0.70	0.70	1.42	0.87	3.33
1	3	-99	2	49	1	1	2	1	4	1	3	1	1	1	3	3	3	4	4	3	4	4	4	4	3	3	3	3	3	3	4	3	1	3	3	3	3	3	3	0.50	0.30	0.30	0.30	-99.00	0.10	0.30	2.92	0.33	3.00
1	1	1	2	56	0	4	1	1	3	1	2	4	2	3	3	2	3	2	2	1	3	3	1	3	1	1	3	1	1	1	4	4	1	1	1	2	1	1	2	0.90	0.90	0.90	0.90	-99.00	0.90	0.90	1.67	0.90	2.67
1	1	1	2	56	1	4	1	1	4	1	1	4	4	4	2	2	4	2	3	4	4	4	2	4	4	2	2	1	2	1	2	2	2	2	2	2	2	1	2	0.90	0.90	0.90	0.90	-99.00	0.90	0.90	1.75	0.90	4.00
1	1	1	1	65	0	3	1	1	4	4	2	2	1	4	2	2	2	2	4	3	3	4	1	4	5	2	3	2	1	1	1	2	1	2	2	4	2	1	1	0.70	0.90	0.70	0.70	0.90	0.90	0.90	1.67	0.77	3.00
1	3	-99	1	63	0	4	2	1	3	2	2	3	2	2	3	2	2	2	3	2	3	3	2	2	2	2	2	2	2	3	2	2	2	2	2	2	2	2	3	0.70	0.90	0.90	0.90	0.70	0.70	0.90	2.17	0.83	2.33
1	1	1	2	59	0	3	1	1	2	1	2	2	2	2	4	2	2	4	2	2	3	4	2	4	2	2	2	2	2	2	1	2	1	1	1	1	1	1	2	0.70	0.90	0.90	0.90	0.70	0.90	0.90	1.42	0.83	2.67
1	1	1	2	60	0	4	1	1	4	2	2	4	2	4	4	2	2	2	4	2	2	4	2	3	2	1	2	2	2	2	2	2	2	2	2	2	2	2	2	0.70	0.70	0.70	0.90	0.70	0.70	0.90	2.00	0.73	3.00
1	1	1	2	41	0	2	1	1	3	3	2	3	2	2	3	2	2	3	2	2	3	3	3	3	2	2	2	2	1	1	1	2	2	2	1	2	2	1	1	0.70	0.70	0.70	0.90	0.70	0.70	0.70	1.50	0.73	2.67
1	3	-99	2	57	0	2	2	1	1	1	1	1	1	1	2	1	1	3	1	2	2	3	1	3	1	1	1	1	2	1	1	1	2	2	2	1	1	1	1	0.50	0.70	0.90	0.90	0.90	0.90	0.90	1.33	0.80	1.67
1	1	1	2	53	0	2	1	2	3	1	5	3	1	2	4	3	4	1	1	2	3	5	2	3	2	3	3	1	1	3	2	3	3	2	1	1	3	1	3	0.90	0.90	0.90	0.90	0.90	0.90	0.70	2.00	0.90	2.33
1	1	1	1	55	0	2	1	1	5	1	3	4	4	1	3	2	2	2	1	1	3	3	1	3	3	1	1	1	1	1	1	1	1	1	1	1	1	1	1	0.50	0.90	0.90	0.90	0.90	0.90	0.90	1.00	0.83	4.00
1	1	1	2	32	0	4	1	1	3	2	2	4	3	3	2	2	3	2	3	2	4	3	2	4	2	2	2	2	2	1	2	2	2	2	2	2	2	2	2	0.70	0.70	0.70	0.70	0.70	0.50	0.70	1.92	0.70	3.33
1	1	1	2	57	1	4	1	1	2	1	2	5	1	2	4	2	2	4	2	1	2	3	1	2	1	1	2	1	1	1	1	1	4	1	1	1	1	1	2	0.90	0.90	0.90	0.90	-99.00	0.90	0.90	1.33	0.90	1.67
1	3	-99	2	56	0	3	2	1	2	1	1	5	1	4	3	1	1	2	1	1	3	4	1	3	3	1	2	2	4	2	2	2	2	2	2	2	2	2	2	0.70	0.70	0.70	0.50	0.70	0.30	0.70	2.17	0.67	2.00
1	1	1	2	54	0	4	1	1	2	1	1	1	1	1	1	1	1	1	1	1	1	5	1	1	1	1	1	1	1	1	1	1	1	1	1	1	1	1	1	0.70	0.90	0.90	0.90	0.90	0.90	0.90	1.00	0.87	1.33
1	3	-99	2	61	0	2	2	1	2	1	4	5	3	4	3	4	4	4	2	4	4	5	4	4	4	4	5	3	2	3	1	3	3	3	2	2	3	2	3	0.70	-99.00	0.50	0.90	0.70	0.30	0.70	2.50	0.67	3.00
1	3	-99	2	63	0	2	2	1	2	2	1	4	2	4	3	2	1	2	2	2	4	4	2	4	2	4	2	2	2	2	2	2	2	2	2	2	2	1	2	0.70	0.90	0.90	0.70	0.90	0.90	0.70	1.92	0.83	2.67
1	1	1	2	43	0	4	1	1	3	1	2	5	1	2	4	2	2	4	1	2	4	4	2	3	1	3	1	2	2	1	2	2	2	1	2	2	2	1	2	0.70	0.90	0.90	0.90	0.90	0.70	0.90	1.75	0.87	2.33
1	1	1	2	46	0	4	1	1	2	2	4	3	3	2	4	3	2	4	2	4	2	3	3	3	3	2	4	2	2	2	2	2	2	2	2	2	2	2	2	0.90	0.70	0.70	0.70	0.70	0.70	0.90	2.00	0.73	2.67
1	1	1	2	51	0	4	1	1	2	2	1	4	2	2	2	2	4	4	2	2	3	4	3	4	3	2	1	3	1	2	3	2	2	2	2	2	2	3	2	0.90	0.70	0.70	0.70	0.30	0.90	-99.00	2.17	0.67	2.67
1	1	1	2	56	1	4	1	1	2	1	1	-99	1	1	2	1	1	2	1	1	4	5	1	4	-99	1	1	1	1	1	1	1	1	1	1	1	1	1	1	0.70	0.90	0.90	0.90	0.90	0.90	0.90	1.00	0.87	2.33
1	1	1	2	54	1	4	1	1	2	1	1	4	2	3	2	4	2	3	2	2	2	2	2	2	1	1	1	1	2	3	2	2	2	1	2	1	1	2	2	0.90	0.90	0.90	0.90	0.70	0.90	0.90	1.75	0.87	2.00
1	1	1	2	57	1	4	1	1	2	1	1	3	2	1	3	3	2	2	3	2	2	4	2	2	1	1	3	1	1	1	1	2	2	1	2	1	1	1	1	0.70	0.90	0.70	0.90	-99.00	0.90	0.90	1.25	0.80	2.00
1	1	1	1	40	0	3	1	1	1	1	1	4	2	2	3	2	2	2	4	2	3	5	2	3	2	2	2	1	1	1	1	1	1	1	2	2	2	1	1	0.90	0.90	0.90	0.90	0.90	0.90	0.90	1.25	0.90	2.00
1	1	1	1	44	0	4	1	1	5	2	5	4	4	2	5	5	3	2	2	4	5	4	2	5	4	4	4	2	2	4	3	3	3	2	2	2	2	3	3	0.70	0.30	0.50	0.50	0.10	0.70	0.30	2.58	0.43	4.67
1	1	1	1	55	1	4	1	1	3	2	4	4	4	4	3	3	-99	3	3	4	3	3	3	4	3	2	4	3	3	3	3	3	3	3	3	3	3	3	3	0.70	0.70	0.70	0.70	-99.00	0.50	0.70	3.00	0.70	3.67
1	1	1	2	38	0	1	1	1	5	1	5	5	5	5	5	5	5	3	4	5	5	5	3	5	4	3	5	2	3	2	3	2	2	4	3	2	2	2	2	0.10	0.50	0.50	0.70	0.90	0.10	0.30	2.42	0.53	5.00
1	1	1	2	58	0	4	1	1	4	1	2	4	4	2	3	2	4	4	1	2	4	4	1	4	1	2	4	2	1	2	2	2	2	3	2	3	3	2	2	0.50	0.50	0.70	0.70	0.90	0.50	0.50	2.17	0.67	4.00
1	1	1	2	60	0	4	1	1	3	2	1	4	2	2	2	2	3	4	3	3	3	4	2	2	2	2	1	3	1	1	2	1	1	1	2	3	2	2	2	0.70	0.90	0.70	0.70	0.90	0.90	0.70	1.75	0.77	2.33
1	1	1	2	55	0	4	1	1	4	2	4	4	3	3	4	3	4	2	3	2	3	4	2	4	2	2	3	1	2	3	2	2	2	2	2	1	2	2	2	0.50	0.70	0.90	0.70	0.70	0.70	0.90	1.92	0.73	3.67
1	1	1	2	51	0	2	1	1	3	2	2	4	1	2	2	2	4	4	3	2	2	2	2	2	2	1	1	2	1	1	2	2	1	2	2	1	1	1	2	0.50	0.70	0.70	0.70	0.70	0.70	0.70	1.50	0.67	2.00
1	3	-99	2	40	0	4	2	1	2	2	1	3	2	2	2	2	4	4	3	1	4	4	2	2	4	1	2	2	1	1	1	1	4	3	1	2	1	2	1	0.50	0.50	0.70	0.30	0.70	0.30	0.30	1.67	0.57	2.00
1	3	-99	2	54	1	4	2	1	2	2	2	1	2	4	4	3	2	4	3	3	4	4	2	4	2	2	1	2	1	1	2	2	2	2	2	2	2	2	2	0.50	0.70	0.70	0.70	0.70	0.90	0.70	1.83	0.67	2.67
1	1	1	1	42	1	2	1	1	4	1	3	3	2	3	5	3	4	4	4	4	3	4	1	4	2	2	2	3	2	4	3	4	3	4	3	4	3	3	4	0.70	0.50	0.50	0.50	-99.00	0.70	0.50	3.33	0.53	3.33
1	1	1	2	44	0	4	1	1	2	5	2	4	2	2	4	2	2	4	2	2	2	2	2	4	2	2	2	2	2	2	2	2	2	2	2	2	2	2	2	0.70	0.90	0.70	0.70	0.70	0.70	0.70	2.00	0.73	2.67
1	1	1	2	30	0	3	1	1	4	1	2	4	2	2	4	3	4	2	3	2	4	4	1	3	1	2	2	2	1	1	1	1	1	1	1	3	1	1	1	0.70	0.90	0.90	0.70	0.90	0.70	0.70	1.25	0.83	3.00
1	1	1	2	37	0	3	1	1	2	2	2	4	1	3	3	3	2	2	2	2	3	4	2	3	2	1	2	1	1	1	1	1	1	2	1	2	2	1	1	0.10	0.70	0.70	0.50	0.90	0.70	0.50	1.25	0.60	2.00
1	1	1	1	50	0	4	1	1	1	2	3	2	2	3	3	3	3	3	3	2	3	3	2	3	2	3	2	2	2	2	2	2	2	2	2	2	2	1	2	0.50	0.90	0.90	0.70	-99.00	0.70	0.90	1.92	0.77	2.00
1	3	-99	2	47	1	2	2	1	4	3	2	2	4	4	2	5	4	5	4	4	4	2	4	4	4	2	2	4	3	3	4	4	4	4	3	2	4	2	2	0.30	0.50	0.50	0.70	-99.00	0.70	0.50	3.25	0.53	4.00
1	1	1	2	39	0	3	1	1	3	2	2	3	3	3	4	3	3	3	3	3	3	4	2	3	2	3	3	2	1	2	2	2	2	2	2	2	2	2	2	0.70	0.90	0.90	0.90	0.90	0.90	0.90	1.92	0.87	3.00
1	1	1	2	56	1	4	1	1	3	2	3	3	4	2	5	3	2	2	2	1	3	3	2	3	1	2	2	2	2	2	2	2	2	2	2	2	2	2	3	0.70	0.90	0.90	0.90	-99.00	0.70	0.70	2.08	0.87	3.33
1	1	1	2	48	0	1	1	1	3	1	3	4	5	4	3	3	3	3	3	4	4	4	3	4	4	4	3	4	2	2	1	2	1	3	2	2	2	2	1	0.50	0.50	0.50	0.70	0.50	0.70	0.50	2.00	0.53	4.00
1	1	1	1	36	0	3	1	1	4	1	4	5	5	4	4	3	4	2	2	5	5	5	2	4	4	2	5	2	1	1	1	2	1	2	3	1	1	2	1	0.50	0.50	0.70	0.50	0.90	0.70	0.90	1.50	0.63	4.33
1	1	1	2	58	1	1	1	1	2	1	2	2	2	2	2	3	4	3	2	3	3	4	2	3	2	3	3	2	1	1	2	2	2	2	2	2	2	2	2	0.50	0.50	0.50	0.70	-99.00	0.70	0.30	1.83	0.57	2.33
1	1	1	2	53	0	3	1	1	2	1	2	5	2	2	4	2	4	4	2	4	4	4	2	4	3	2	2	3	2	3	2	4	2	2	2	3	2	2	1	0.70	0.70	0.90	0.90	0.70	0.70	0.70	2.33	0.80	2.67
1	1	1	2	35	0	2	1	1	3	2	3	4	2	3	3	2	3	4	2	2	4	4	1	3	2	1	1	2	1	1	2	1	2	1	1	2	2	1	1	0.50	0.70	0.70	0.90	0.90	0.90	0.70	1.42	0.73	2.67
1	1	1	2	50	0	4	1	1	4	1	3	4	2	4	3	2	2	2	3	2	4	4	-99	3	2	2	2	2	2	2	1	1	1	2	1	1	1	1	1	0.70	0.90	0.90	0.90	0.90	0.90	0.90	1.33	0.87	3.00
1	1	1	2	36	0	4	1	1	4	1	1	3	1	1	2	2	2	4	2	1	2	3	1	2	1	2	2	-99	-99	-99	-99	-99	-99	-99	-99	-99	-99	-99	-99	0.70	0.70	0.70	0.70	0.50	0.70	0.70	-99	0.67	2.33
1	1	1	2	36	0	4	1	1	4	1	2	3	2	2	2	2	1	4	2	2	2	3	1	3	1	3	1	2	1	1	2	2	1	1	2	2	2	2	2	0.70	0.70	0.70	0.70	0.50	0.70	0.70	1.67	0.67	3.00
1	1	1	1	37	0	4	1	1	4	2	1	3	2	4	4	3	2	4	4	2	2	3	3	3	2	4	1	1	2	2	2	2	2	2	1	3	2	1	2	0.70	0.50	0.70	0.50	0.70	0.70	0.50	1.83	0.63	3.00
1	1	1	2	42	0	4	1	1	2	4	1	5	2	1	2	2	5	2	4	2	4	5	4	4	2	1	2	1	1	4	1	1	1	1	1	1	1	1	1	0.90	0.90	0.90	0.90	0.90	0.90	0.90	1.25	0.90	2.67
1	1	1	2	42	0	4	1	1	1	1	1	5	2	2	4	2	1	4	1	2	4	4	1	4	2	2	1	1	1	1	1	1	1	3	1	2	1	1	1	0.70	0.70	0.70	0.70	0.90	0.90	0.90	1.25	0.73	2.33
1	1	1	2	55	1	4	1	1	3	2	2	4	3	2	3	3	2	4	2	2	3	4	1	4	2	2	2	1	1	2	2	2	2	2	2	2	2	1	2	0.70	0.70	0.70	0.90	-99.00	0.90	0.70	1.75	0.77	3.33
1	1	1	2	37	0	2	1	1	4	2	2	4	4	4	3	4	2	3	3	4	4	4	2	4	3	3	3	2	3	3	2	3	2	2	2	3	3	2	2	0.50	0.70	0.70	0.70	0.70	0.70	0.70	2.42	0.67	4.00
1	1	1	1	52	0	3	1	1	2	1	2	4	2	2	2	2	2	3	2	3	3	4	2	3	2	2	3	2	2	2	1	2	1	2	2	2	3	-99	2	0.50	0.70	0.70	0.70	0.50	0.70	0.70	1.91	0.63	2.33
1	1	1	2	39	0	4	1	1	4	2	2	4	2	3	3	3	2	4	4	2	4	4	2	4	2	2	2	1	1	1	2	1	1	1	2	2	2	1	1	0.70	0.70	0.70	0.70	0.70	0.70	0.70	1.33	0.70	3.33
1	1	1	2	28	0	4	1	1	3	2	4	4	2	4	4	2	2	4	2	4	2	4	2	4	2	4	2	2	2	2	2	2	2	2	2	2	2	3	2	0.70	0.70	0.70	0.70	0.70	0.70	0.70	2.08	0.70	3.00
1	1	1	2	45	0	4	1	1	3	2	2	4	2	1	4	3	3	2	3	2	4	4	1	4	1	1	2	1	1	1	1	2	1	1	1	-99	3	1	1	0.70	0.90	0.90	0.70	0.90	0.90	0.90	1.27	0.83	3.00
1	1	1	1	32	1	4	1	1	4	1	2	3	2	1	2	2	3	4	2	2	3	3	2	4	4	4	2	1	2	2	2	2	2	2	2	2	2	2	2	0.50	0.30	-99.00	0.50	-99.00	0.50	0.30	1.92	0.45	3.33
1	1	1	1	57	0	2	1	1	1	2	1	1	1	1	3	2	2	2	1	3	2	1	1	1	1	1	1	3	3	4	4	4	1	4	3	3	4	4	3	0.70	0.70	0.90	0.70	0.70	0.50	0.70	3.33	0.77	1.00
1	1	1	2	44	0	2	1	1	2	2	2	4	3	2	4	1	2	2	2	2	4	2	2	4	2	2	2	2	1	2	1	2	2	2	2	1	1	1	1	0.30	0.70	0.70	0.70	0.90	-99.00	0.70	1.50	0.67	3.00
1	1	1	2	41	0	2	1	1	4	2	5	4	5	3	5	5	4	4	2	4	4	5	2	4	2	4	4	2	2	1	2	3	2	2	2	2	3	3	3	0.70	0.30	0.30	0.50	-99.00	0.50	0.50	2.25	0.43	4.33
1	3	-99	1	47	1	1	2	1	2	2	2	2	1	2	3	2	2	2	2	4	2	2	2	2	1	2	2	2	2	3	3	2	2	3	3	3	2	2	2	0.50	0.70	0.70	0.70	0.70	0.50	0.70	2.42	0.67	1.67
1	1	1	2	43	0	4	1	1	2	2	3	3	3	4	3	3	3	3	3	3	3	3	2	2	3	2	3	2	2	2	2	2	2	2	2	2	2	2	2	0.70	0.70	0.70	0.70	0.90	0.70	0.70	2.00	0.73	2.33
1	1	1	2	36	0	4	1	1	4	1	1	5	3	2	3	2	2	3	2	2	3	4	2	3	2	3	2	1	1	1	1	2	1	2	1	1	1	1	1	0.90	0.90	0.90	0.90	0.90	0.90	0.90	1.17	0.90	3.33
1	1	1	2	47	0	3	1	1	4	1	5	3	5	2	5	5	5	2	2	5	5	5	1	5	5	2	2	4	2	4	1	4	3	4	1	3	3	3	4	0.70	0.70	0.50	0.70	0.50	0.90	0.70	3.00	0.60	4.67
1	1	1	1	64	0	3	1	1	4	2	2	4	4	3	2	2	2	2	2	2	4	4	2	3	2	3	2	2	2	2	2	2	2	2	2	2	2	2	2	0.70	0.70	0.70	0.70	0.70	0.70	0.70	2.00	0.70	3.67
1	1	1	2	35	0	3	1	1	1	1	1	2	2	4	1	2	4	2	2	2	2	4	1	1	2	1	2	2	1	1	1	1	1	1	1	1	1	1	1	0.70	0.90	0.90	0.90	0.90	0.70	0.90	1.08	0.87	1.33
1	1	1	2	47	0	2	1	1	3	2	4	4	3	3	3	3	3	3	1	3	4	4	2	4	2	2	2	1	2	2	1	2	1	1	1	1	1	1	2	0.50	0.70	0.70	0.70	0.90	0.70	0.70	1.33	0.70	3.33
1	1	1	2	35	0	3	1	1	3	3	2	3	2	4	2	2	2	4	3	2	3	4	3	3	3	2	2	2	1	2	1	1	2	1	2	2	2	1	1	0.70	0.90	0.90	0.70	0.90	0.70	0.90	1.50	0.83	2.67
1	1	1	2	28	0	4	1	1	3	1	2	4	2	5	3	3	3	4	2	3	4	4	2	4	4	4	3	2	2	2	2	2	2	2	2	3	2	2	2	0.50	0.90	0.70	0.70	0.50	0.50	0.70	2.08	0.67	3.00
1	1	1	2	39	1	4	1	1	2	2	2	3	2	4	2	2	2	2	2	3	4	4	2	3	2	1	2	2	2	2	1	2	2	2	2	2	2	2	2	0.70	0.90	0.90	0.70	0.90	0.70	0.70	1.92	0.83	2.33
1	1	1	2	36	0	4	1	1	5	3	2	5	2	3	3	2	4	3	3	2	5	5	2	4	3	2	2	1	2	1	1	1	1	2	2	2	2	2	2	0.90	0.70	0.90	0.90	0.50	0.90	0.70	1.58	0.80	3.67
1	1	1	2	35	0	4	1	1	2	2	2	3	3	3	4	3	4	2	2	3	4	4	2	4	2	3	2	2	2	2	2	2	2	1	1	2	2	1	2	0.90	0.90	0.90	0.90	0.90	0.90	0.90	1.75	0.90	3.00
1	1	1	2	42	0	3	1	1	2	1	2	3	2	2	3	2	2	4	2	3	3	4	2	4	2	3	2	2	2	2	2	2	2	2	2	2	2	1	2	0.70	0.70	0.70	0.70	0.70	0.70	0.70	1.92	0.70	2.67
1	1	1	2	57	0	3	1	1	2	2	1	3	2	1	2	2	1	4	2	4	3	3	2	2	2	2	2	1	2	2	1	2	2	1	1	1	1	1	1	0.70	0.90	0.90	0.90	0.90	0.90	0.90	1.33	0.87	2.00
1	3	-99	2	44	0	4	2	1	2	1	2	3	2	1	5	2	1	2	1	1	2	3	1	2	1	1	1	1	1	1	1	2	2	1	2	2	2	1	2	0.70	0.90	0.90	0.90	0.90	0.70	0.90	1.50	0.87	2.00
1	1	1	2	38	0	4	1	1	2	3	2	3	2	2	3	3	2	2	1	1	3	4	1	1	1	1	2	1	4	1	4	1	1	1	1	1	4	1	2	0.90	0.90	0.90	0.90	0.90	0.90	0.90	1.83	0.90	1.67
1	1	1	2	38	0	4	1	1	5	2	4	3	3	3	4	3	2	5	1	2	4	4	2	4	2	2	2	2	1	1	1	1	1	1	1	3	2	2	1	0.70	0.70	0.70	0.70	0.90	0.90	0.70	1.42	0.73	4.00
1	1	1	2	38	0	4	1	1	2	1	2	3	2	3	2	2	2	4	2	3	3	4	2	3	3	3	2	2	1	2	2	2	2	2	2	2	2	1	1	0.90	0.90	0.90	0.90	-99.00	0.90	0.90	1.75	0.90	2.33
1	1	1	2	38	0	4	1	1	4	1	2	4	2	3	3	3	3	2	1	2	5	5	2	4	1	3	2	1	1	1	1	2	1	1	1	2	2	1	1	0.90	0.90	0.90	0.90	0.90	0.90	0.90	1.25	0.90	3.33
1	1	1	2	30	0	4	1	1	3	2	1	3	2	3	2	2	3	3	2	1	4	4	1	4	3	3	3	2	2	1	1	2	2	2	2	2	2	1	1	0.70	0.70	0.70	0.70	0.70	0.70	0.70	1.67	0.70	3.00
1	1	1	2	45	0	2	1	1	3	1	4	4	4	3	5	4	4	4	4	4	4	4	2	4	4	3	4	-99	-99	-99	-99	-99	-99	-99	-99	-99	-99	-99	-99	0.70	0.90	0.90	0.90	0.90	0.70	0.90	-99	0.87	3.67
1	1	1	2	34	0	4	1	1	2	1	2	5	2	3	2	2	2	5	4	2	2	4	3	3	2	3	1	3	2	2	2	2	2	3	2	2	2	2	3	0.70	0.70	0.70	0.90	0.50	0.70	0.70	2.25	0.70	2.33
1	3	-99	2	40	0	2	2	1	2	2	3	2	1	3	4	3	2	4	3	3	3	3	1	3	2	2	3	2	2	2	2	3	2	2	2	2	2	2	2	0.70	0.70	0.70	0.70	0.70	0.70	0.70	2.08	0.70	2.00
1	1	1	2	32	0	4	1	1	3	1	2	4	3	3	2	2	4	4	2	3	4	5	2	4	3	1	2	2	2	2	2	2	2	2	2	2	3	2	3	0.70	0.90	0.90	0.90	0.90	0.70	0.90	2.17	0.87	3.33
1	1	1	2	73	0	2	1	1	4	1	1	-99	3	-99	3	1	3	4	3	2	3	4	3	2	2	1	-99	2	2	2	2	2	2	2	2	3	2	2	2	0.50	-99.00	0.90	0.90	0.50	0.90	-99.00	2.08	0.70	3.00
1	1	1	2	25	1	2	1	1	2	2	1	3	2	2	2	1	1	3	2	1	4	4	1	4	1	2	2	1	2	1	1	3	2	1	1	2	2	1	2	0.90	0.70	0.70	0.90	-99.00	0.90	0.90	1.58	0.80	2.67
1	1	1	2	21	0	3	1	1	3	2	5	3	4	2	4	4	2	2	2	3	3	4	4	4	2	4	4	1	1	2	1	3	2	1	2	2	2	2	2	0.70	0.50	0.70	0.70	-99.00	0.70	0.70	1.75	0.67	3.67
1	1	1	2	34	0	4	1	1	2	3	2	3	1	1	3	1	2	4	2	2	2	3	1	3	1	2	3	1	2	1	1	1	1	1	1	1	2	1	1	0.90	0.90	0.70	0.70	0.90	0.90	0.70	1.17	0.80	2.00
1	1	1	1	51	0	4	1	1	4	2	2	5	2	4	3	2	1	4	2	2	4	4	2	4	2	2	2	2	1	1	1	1	1	2	1	1	1	1	1	0.50	0.70	0.70	0.70	0.90	0.70	0.70	1.17	0.70	3.33
1	1	1	2	53	0	2	1	1	2	3	4	2	-99	2	-99	4	2	4	2	2	4	4	2	3	2	4	2	2	2	2	2	2	2	2	2	2	2	2	2	0.70	0.70	0.70	0.70	0.70	0.70	0.70	2.00	0.70	2.50
1	1	1	1	66	0	4	1	1	4	3	4	4	4	4	4	4	3	2	4	2	4	4	2	3	2	2	3	2	2	2	2	2	2	2	2	2	2	2	2	0.50	0.70	0.70	0.70	0.70	0.70	0.70	2.00	0.67	3.67
1	1	1	2	36	0	2	1	1	4	2	2	3	2	3	4	2	3	3	2	2	3	3	2	3	1	2	2	2	2	2	2	2	2	2	2	2	2	2	2	0.50	0.70	0.70	0.70	0.70	0.70	0.70	2.00	0.67	3.00
1	1	1	2	24	0	3	1	1	5	2	5	3	4	4	5	3	2	4	3	4	4	3	5	4	2	4	4	2	4	4	3	4	4	2	2	3	2	3	4	0.70	0.50	0.50	0.70	0.70	0.70	0.50	3.08	0.60	4.33
1	1	1	1	33	0	4	1	1	2	1	4	4	3	2	5	4	4	4	3	4	3	3	2	4	3	4	3	2	2	2	3	2	2	2	2	2	2	2	2	0.30	0.50	0.50	0.50	0.50	0.50	0.50	2.08	0.47	3.00
1	1	1	2	36	0	4	1	1	3	1	1	5	3	5	2	2	2	2	2	1	3	5	1	4	4	2	2	2	1	1	1	1	1	3	2	1	2	1	2	0.70	0.90	0.90	0.90	0.90	0.70	0.70	1.50	0.87	3.33
1	1	1	2	58	0	2	1	1	2	2	2	4	2	2	3	2	2	2	3	3	4	4	2	4	2	2	2	2	2	2	2	2	2	2	2	2	2	2	2	0.70	0.70	0.70	0.70	0.70	0.70	0.70	2.00	0.70	2.67
1	1	1	2	21	0	3	1	1	4	2	2	4	5	4	2	2	4	3	3	4	3	4	2	4	3	2	2	2	1	2	1	2	2	1	1	2	2	2	1	0.70	0.70	0.50	0.90	0.90	0.90	0.70	1.58	0.70	4.33
1	1	1	2	46	0	2	1	1	4	2	4	4	4	2	2	4	4	2	2	4	4	4	2	4	4	2	2	2	2	3	1	2	2	2	2	2	2	1	2	0.70	0.70	0.70	0.70	0.70	0.70	0.70	1.92	0.70	4.00
1	3	-99	2	41	0	4	2	1	4	2	4	4	4	2	5	4	5	5	2	5	3	4	2	4	2	3	4	1	1	2	1	2	2	1	1	2	2	1	2	0.50	0.30	0.30	0.70	0.90	0.70	0.50	1.50	0.50	4.00
1	1	1	2	33	0	3	1	1	2	1	3	2	2	2	4	2	3	4	3	3	4	4	2	3	2	3	3	2	1	2	2	2	2	2	2	2	2	2	2	0.30	0.70	0.30	0.70	0.70	0.50	0.50	1.92	0.50	2.33
1	1	1	2	31	0	3	1	1	2	2	2	4	2	3	2	1	2	4	2	2	2	4	2	4	2	2	2	2	2	2	2	2	2	2	2	2	2	2	2	0.90	0.90	0.90	0.90	0.90	0.70	0.90	2.00	0.90	2.67
1	1	1	2	35	0	4	1	1	4	2	2	3	2	2	3	2	2	2	2	2	2	4	2	3	2	2	2	2	2	2	2	2	2	2	1	2	2	2	2	0.70	0.90	0.70	0.70	0.70	0.70	0.90	1.92	0.73	3.00
1	1	1	2	35	0	4	1	1	2	2	2	4	2	2	3	2	1	3	4	2	3	5	1	3	2	2	1	3	2	1	1	2	1	1	1	2	2	1	1	0.70	0.70	0.90	0.90	0.70	0.70	0.90	1.50	0.80	2.33
1	1	1	2	61	0	3	1	1	3	3	1	3	1	4	3	1	2	4	3	1	4	4	2	4	3	4	1	-99	-99	-99	-99	-99	-99	-99	-99	-99	-99	-99	-99	0.30	0.90	0.90	0.90	0.50	0.70	0.90	-99.00	0.73	2.67
1	1	1	2	70	1	4	1	1	3	1	2	3	2	2	4	3	2	2	2	2	3	3	1	3	1	1	2	1	1	2	1	2	1	1	1	1	1	1	2	0.90	0.90	0.90	0.90	-99.00	0.90	0.90	1.25	0.90	2.67
1	3	-99	2	53	0	4	2	1	1	1	1	5	1	2	2	1	1	5	1	1	2	4	1	1	1	2	2	2	1	1	1	2	1	1	2	1	1	1	1	0.70	0.90	0.70	0.90	0.90	0.90	0.90	1.25	0.80	1.00
1	1	1	1	52	0	2	1	1	4	3	3	5	3	4	4	3	4	3	3	2	3	4	3	3	3	2	2	2	2	3	2	3	2	1	1	2	2	1	2	0.90	0.70	0.70	0.70	0.90	0.90	0.90	1.92	0.77	3.33
1	1	1	2	35	0	4	1	1	3	2	2	4	3	3	2	2	3	4	2	3	4	4	2	4	3	4	2	2	2	2	2	2	2	2	2	2	2	3	2	0.70	0.70	0.70	0.70	0.90	0.90	0.90	2.08	0.73	3.33
1	1	1	2	24	0	4	1	1	4	1	1	5	2	2	2	2	2	2	2	1	4	5	1	4	1	2	2	1	1	1	1	1	1	2	1	1	1	1	1	0.70	0.90	0.90	0.90	0.90	0.90	0.90	1.08	0.87	3.33
1	3	-99	2	51	0	4	2	1	4	3	2	4	2	3	4	3	3	2	3	2	4	5	1	3	2	2	2	1	1	2	1	2	1	1	1	2	1	1	1	0.70	0.90	0.70	0.70	0.90	0.90	0.90	1.25	0.77	3.00
1	3	-99	2	40	1	4	2	1	2	2	2	3	2	3	2	3	2	4	4	2	3	3	3	3	4	4	3	-99	-99	-99	-99	-99	-99	-99	-99	-99	-99	-99	-99	0.70	0.50	0.50	0.70	-99.00	0.70	0.50	-99.00	0.60	2.33
1	1	1	2	64	0	4	1	1	3	2	2	3	-99	2	3	2	2	2	2	2	3	4	2	4	2	3	2	1	2	1	2	2	2	1	2	2	2	1	2	0.90	0.90	0.90	0.90	0.90	0.90	0.90	1.67	0.90	3.50
1	3	-99	2	38	0	2	2	1	2	4	3	2	1	5	4	4	3	4	4	3	4	3	3	3	3	2	2	2	2	2	3	1	2	2	2	3	2	1	1	0.70	0.90	0.90	0.70	0.90	0.70	0.90	1.92	0.83	2.00
1	3	-99	2	48	0	4	2	1	2	1	1	4	2	4	2	1	4	5	4	2	2	2	1	2	1	1	1	2	2	1	1	1	2	2	2	2	1	1	1	0.90	0.70	0.90	0.90	0.90	0.50	0.70	1.50	0.87	2.00
1	3	-99	2	45	0	4	2	1	2	3	4	2	3	2	4	4	2	2	2	3	2	4	2	3	2	2	2	2	2	2	2	2	2	2	2	2	2	2	3	0.90	0.90	0.90	0.70	0.70	0.70	0.70	2.08	0.83	2.67
1	1	1	2	38	0	4	1	1	4	2	3	5	3	4	4	3	2	4	3	2	4	5	2	3	3	2	2	1	2	1	1	2	2	1	2	2	2	1	1	0.70	0.70	0.70	0.90	0.70	0.90	0.70	1.50	0.73	3.33
1	1	1	1	46	0	2	1	1	4	2	4	3	4	4	4	4	4	3	3	4	4	4	3	5	5	4	5	1	3	3	3	3	2	4	4	3	3	2	3	0.50	0.30	0.30	0.50	0.50	0.50	0.30	2.83	0.40	4.33
1	1	1	2	32	0	4	1	1	4	4	2	4	2	2	4	2	3	4	3	4	4	5	1	4	2	4	2	2	2	2	1	2	2	1	2	2	1	1	2	0.70	0.70	0.70	0.70	0.70	0.70	0.70	1.67	0.70	3.33
1	1	1	2	32	0	1	1	2	4	4	3	4	4	4	4	4	3	4	3	4	4	4	3	4	4	4	3	3	4	3	3	3	3	4	3	3	3	3	2	0.30	0.30	0.30	0.50	0.10	0.50	0.30	3.08	0.30	4.00
1	1	1	1	59	0	4	1	1	2	2	1	4	2	2	2	2	4	4	2	3	2	4	2	3	2	3	2	1	1	2	2	3	2	2	2	3	2	2	2	0.50	0.50	0.50	0.50	0.50	0.70	0.50	2.00	0.50	2.33
2	2	2	2	60	0	2	1	1	3	3	2	4	2	4	4	4	2	4	3	4	4	4	3	4	2	4	2	3	2	-99	3	3	2	3	3	3	3	2	3	0.70	0.70	0.50	0.70	0.70	0.70	-99.00	2.73	0.63	3.00
2	2	2	1	66	0	2	1	1	2	3	4	3	4	3	4	2	2	4	2	4	4	4	3	4	3	2	3	2	2	2	2	3	3	3	2	2	3	2	2	0.50	0.50	0.70	0.70	0.70	0.70	-99.00	2.33	0.63	3.33
2	2	2	2	54	0	2	1	2	5	3	4	3	5	3	2	3	2	4	2	2	-99	5	2	5	4	3	2	2	2	2	2	2	2	2	2	2	2	2	2	0.30	0.30	0.30	0.50	0.70	0.70	-99.00	2.00	0.40	5.00
2	2	2	1	54	0	1	1	2	5	1	4	3	4	3	4	3	2	2	3	4	5	5	3	4	2	2	2	3	2	3	1	4	2	4	2	2	2	1	2	0.70	0.50	0.50	0.50	0.70	0.70	-99.00	2.33	0.57	4.33
2	2	2	2	52	0	2	2	1	4	1	1	5	5	4	4	3	4	2	2	5	5	4	2	5	5	2	2	3	3	3	3	3	3	3	3	3	3	2	2	0.50	0.50	0.50	0.70	-99.00	0.70	-99.00	2.83	0.57	4.67
2	2	2	1	53	1	1	1	1	4	2	3	2	3	2	4	4	4	4	3	3	3	4	2	3	2	2	3	2	2	2	3	2	2	2	2	2	2	2	2	0.50	0.50	0.70	0.70	-99.00	0.70	-99.00	2.08	0.63	3.33
2	2	2	1	20	0	2	2	1	2	2	2	3	2	2	2	4	4	1	2	4	3	3	2	3	2	2	4	2	1	1	1	1	1	3	1	2	2	2	1	0.70	0.70	0.50	0.70	-99.00	0.70	-99.00	1.50	0.63	2.33
2	2	2	1	53	0	1	1	1	1	1	3	3	2	2	4	1	2	2	3	3	2	2	3	2	2	1	3	2	2	2	1	3	1	1	3	1	1	1	4	0.90	0.90	0.90	0.70	0.70	0.90	-99.00	1.83	0.83	1.67
2	2	2	2	49	1	2	2	1	5	2	5	2	2	2	4	4	4	4	4	5	5	5	2	4	4	2	3	4	2	3	3	3	3	4	2	4	3	3	3	0.50	0.50	0.70	0.70	-99.00	0.90	-99.00	3.08	0.63	3.67
2	2	2	2	50	1	2	2	1	4	2	3	2	2	3	4	3	2	3	2	3	2	4	4	3	2	2	3	-99	2	2	3	3	2	3	2	3	2	2	3	0.70	0.70	0.70	0.70	-99.00	0.70	-99.00	2.45	0.70	3.00
2	2	2	2	46	0	2	2	1	3	2	1	2	2	2	3	3	2	3	4	1	2	2	2	2	4	3	2	2	1	1	1	1	4	3	2	2	2	1	1	0.50	0.30	0.50	0.70	0.70	0.70	-99.00	1.75	0.53	2.33
2	2	2	1	43	0	2	2	1	4	2	1	4	2	2	2	1	1	4	2	2	4	4	4	4	4	4	2	2	3	1	1	4	1	2	2	2	2	1	1	0.70	0.70	0.50	0.10	0.70	0.30	-99.00	1.83	0.53	3.33
2	2	2	1	64	1	2	1	1	3	3	4	3	3	3	4	3	3	3	2	4	4	3	3	3	3	4	3	4	2	3	2	3	2	2	3	3	2	3	3	0.70	0.70	0.70	0.70	-99.00	0.70	-99.00	2.67	0.70	3.00
2	2	2	1	25	0	2	2	1	3	2	3	4	4	2	4	3	-99	2	3	4	3	4	2	4	2	4	3	2	2	2	2	2	2	3	2	2	2	1	2	0.50	0.50	0.70	0.90	0.90	0.90	-99.00	2.00	0.70	3.67
2	2	2	1	29	0	2	2	1	3	2	4	3	2	3	4	3	2	2	4	3	4	4	3	4	2	2	3	2	2	2	2	2	2	2	2	2	2	3	3	0.90	0.70	0.70	0.70	0.90	0.70	-99.00	2.17	0.77	3.00
2	2	2	1	69	0	2	1	2	2	2	4	4	2	5	2	2	2	4	2	3	3	4	3	3	3	3	3	3	2	3	2	3	2	4	3	4	3	3	2	0.90	0.90	0.90	0.90	0.70	0.50	-99.00	2.83	0.87	2.33
2	2	2	1	33	0	2	2	1	3	4	3	2	3	3	3	4	3	3	4	3	4	4	3	4	4	3	4	3	2	2	3	2	2	3	2	2	3	3	2	0.50	0.50	0.70	0.70	0.50	0.50	-99.00	2.42	0.60	3.33
2	2	2	1	37	0	2	2	1	3	1	2	2	3	2	2	2	3	5	1	5	3	3	2	4	3	3	2	2	2	3	4	3	2	4	4	3	3	3	3	0.50	0.30	0.30	0.50	0.30	0.50	-99.00	3.00	0.37	3.33
2	2	2	1	71	0	4	2	1	2	1	1	2	2	2	4	2	1	4	2	1	3	4	2	2	2	2	1	1	1	1	1	1	1	1	1	1	1	1	1	0.70	0.90	0.90	0.90	0.90	0.90	-99.00	1.00	0.87	2.00
2	2	2	2	61	1	2	1	1	4	1	3	4	4	3	3	3	3	3	3	4	4	4	3	4	4	4	4	3	1	3	1	3	2	4	1	3	2	2	2	0.70	0.70	0.70	0.90	-99.00	0.50	-99.00	2.25	0.77	4.00
2	2	2	2	33	2	2	1	1	-99	-99	-99	-99	-99	-99	-99	-99	-99	-99	-99	5	4	3	5	5	5	3	3	4	3	4	2	3	3	4	3	-99	3	2	3	0.30	0.30	0.30	0.50	0.70	0.30	-99.00	3.09	0.40	-99.00
2	2	2	1	38	0	2	1	1	4	2	5	4	3	2	4	4	4	2	3	4	3	3	2	4	3	2	4	2	2	3	2	3	2	2	2	3	2	2	2	0.70	0.70	0.50	0.70	0.50	0.50	-99.00	2.25	0.60	3.67
2	2	2	2	60	0	2	1	1	3	3	3	3	3	3	3	3	3	3	3	3	3	4	3	4	3	3	3	2	3	3	2	2	2	2	2	3	3	2	3	0.50	0.50	0.70	0.90	0.70	0.70	-99.00	2.42	0.67	3.33
2	2	2	1	61	1	2	1	1	4	2	2	4	3	3	3	2	2	2	2	2	3	3	3	3	3	2	2	3	2	2	2	2	2	2	2	2	2	2	2	0.70	0.70	0.70	0.70	-99.00	0.50	-99.00	2.08	0.70	3.33
2	2	2	2	36	0	4	1	1	3	3	2	4	4	4	2	2	2	4	3	2	3	4	2	4	2	2	2	2	2	2	2	2	2	2	2	2	-99	2	2	0.50	0.50	0.70	0.70	0.30	0.50	-99.00	2.00	0.57	3.67
2	2	2	2	58	0	2	1	1	5	2	1	5	2	4	1	2	4	1	4	5	5	5	4	5	4	4	4	4	2	3	1	4	3	3	2	4	1	3	2	0.50	0.50	-99.00	0.70	0.70	0.70	-99.00	2.67	0.60	4.00
2	2	2	2	41	1	4	1	1	1	1	1	1	1	1	3	1	1	2	1	1	2	2	1	4	1	1	1	1	1	2	2	2	2	2	2	2	2	2	2	0.30	0.90	0.90	0.90	0.50	0.90	-99.00	1.83	0.73	2.00
2	2	2	2	43	0	1	1	1	4	4	4	4	4	4	4	4	4	4	4	4	4	4	2	4	4	2	3	2	2	1	2	1	2	2	2	2	2	1	2	0.90	0.70	0.70	0.90	0.70	0.70	-99.00	1.75	0.77	4.00
2	2	2	2	15	0	1	1	1	4	1	1	5	5	5	1	1	2	4	4	3	3	4	4	5	3	2	3	1	1	1	1	3	1	2	1	1	1	1	1	0.50	0.70	0.50	0.90	0.90	0.90	-99.00	1.25	0.67	4.67
2	2	2	2	20	1	2	1	1	3	2	3	2	5	4	2	5	3	2	4	4	4	4	3	5	3	4	3	2	2	1	2	2	2	2	2	2	2	1	2	0.30	0.70	0.70	0.70	-99.00	0.70	-99.00	1.83	0.63	4.33
2	2	2	2	41	0	3	2	1	3	1	4	3	2	2	4	2	2	3	1	4	3	4	1	3	2	2	3	2	3	3	3	3	3	3	3	3	3	-99	3	0.50	0.50	0.50	0.70	0.70	0.70	-99.00	2.91	0.57	2.67
2	2	2	2	40	0	2	2	1	2	2	1	4	2	4	1	1	2	5	4	2	4	5	1	4	2	1	2	1	1	1	1	1	1	1	1	1	1	1	1	0.50	0.70	0.70	0.70	0.90	0.70	-99.00	1.00	0.70	2.67
2	2	2	1	28	0	2	2	1	2	2	4	3	2	2	5	4	4	2	2	4	4	4	2	4	2	2	3	-99	-99	-99	-99	-99	-99	-99	-99	-99	-99	-99	-99	0.70	0.70	0.70	0.70	0.90	0.70	-99.00	-99.00	0.73	2.67
2	2	2	2	22	0	3	2	1	4	4	5	3	3	4	5	5	4	3	2	5	4	4	3	4	2	2	4	2	2	3	2	3	3	3	2	2	2	2	2	0.70	0.70	0.70	0.70	-99.00	0.70	-99.00	2.33	0.70	3.67
2	2	2	1	17	0	1	2	2	3	1	4	3	3	3	4	4	3	2	2	4	3	4	2	4	2	3	3	1	2	2	2	2	2	2	2	2	2	2	2	0.70	0.70	0.70	0.70	-99.00	0.90	-99.00	1.92	0.70	3.33
2	2	2	2	52	0	2	2	2	4	2	5	4	4	4	4	2	4	4	3	4	4	5	3	5	4	5	3	4	3	4	2	3	3	-99	3	3	4	3	4	0.50	0.50	-99.00	0.70	0.30	0.70	-99.00	3.27	0.50	4.33
2	2	2	2	60	1	2	1	1	3	1	4	5	5	5	2	5	5	2	4	5	5	5	-99	5	4	4	5	4	1	2	1	4	1	-99	1	4	1	4	1	0.90	0.90	0.90	0.90	-99.00	0.90	-99.00	2.18	0.90	4.33
2	2	2	1	34	0	1	1	1	3	3	3	3	3	3	3	3	3	3	3	3	3	3	3	3	3	3	3	3	2	4	1	3	3	2	1	4	2	1	2	0.90	0.90	0.90	0.90	0.90	0.90	-99.00	2.33	0.90	3.00
2	2	2	1	27	0	4	1	1	3	1	1	4	3	4	2	2	2	1	2	4	3	4	2	3	2	1	2	2	1	2	2	2	2	2	1	2	1	1	2	0.70	0.90	0.90	0.70	0.90	0.90	-99.00	1.67	0.83	3.00
2	2	2	2	59	1	1	2	1	3	2	4	3	3	4	2	4	4	2	3	4	4	4	4	4	4	3	3	2	2	2	1	2	2	3	2	2	2	2	2	0.70	0.70	0.70	0.90	0.30	0.70	-99.00	2.00	0.67	3.33
2	2	2	1	24	0	2	1	1	2	2	4	2	4	2	4	4	2	2	2	2	2	2	2	3	1	1	3	2	2	2	2	3	3	2	2	2	2	2	3	0.70	0.90	0.90	0.70	0.50	0.70	-99.00	2.25	0.77	3.00
2	2	2	1	35	1	2	1	1	4	2	4	4	4	4	4	4	4	2	4	4	4	4	4	4	4	2	4	-99	-99	-99	-99	-99	-99	-99	-99	-99	-99	-99	-99	0.90	0.30	0.50	0.30	-99.00	0.30	-99.00	-99.00	0.47	4.00
2	2	2	1	38	0	2	2	1	3	4	4	2	4	2	4	4	5	2	3	4	3	4	2	3	4	2	4	1	3	1	1	4	3	3	2	4	3	2	3	0.70	0.70	0.70	0.50	0.50	0.50	-99.00	2.50	0.63	3.33
2	2	2	1	52	0	2	2	1	2	3	2	3	2	3	2	2	2	3	2	4	3	3	2	3	2	1	1	2	2	2	2	2	2	4	2	2	2	2	2	0.30	0.30	0.30	0.50	0.10	0.30	-99.00	2.17	0.30	2.33
2	2	2	2	54	1	3	2	1	5	1	3	5	5	5	5	3	1	4	1	5	5	5	4	5	4	5	3	1	2	2	2	2	1	3	3	2	3	1	1	0.70	0.30	0.30	0.70	-99.00	0.70	-99.00	1.92	0.50	5.00
2	2	2	2	49	0	2	1	1	5	2	3	4	3	5	2	2	3	5	4	4	4	4	3	4	3	2	3	3	3	3	2	3	2	3	2	2	2	2	2	0.50	0.50	0.70	0.70	0.70	0.70	-99.00	2.42	0.63	4.00
2	2	2	2	49	0	2	1	2	3	1	3	3	2	3	5	4	4	4	1	3	3	4	1	3	1	1	3	1	3	3	2	3	3	2	2	2	2	2	2	0.70	0.30	0.30	0.50	0.50	0.50	-99.00	2.25	0.43	2.67
2	2	2	1	52	0	4	2	2	3	4	3	4	1	4	3	2	3	3	4	3	4	5	2	3	1	2	3	2	2	1	1	-99	3	2	2	2	2	2	2	0.50	0.70	-99.00	0.70	0.70	0.70	-99.00	1.91	0.65	2.33
2	2	2	1	22	0	1	1	-99	3	3	5	3	5	3	5	3	1	5	4	5	2	5	1	2	4	2	5	3	2	2	2	2	2	2	2	3	3	2	3	0.50	0.10	0.10	0.10	-99.00	0.50	-99.00	2.33	0.17	3.33
2	2	2	1	48	1	1	2	1	4	4	3	2	2	2	3	2	2	5	4	4	2	2	4	3	3	4	4	3	3	3	3	3	3	3	3	3	3	3	3	0.30	0.30	0.50	0.50	-99.00	0.50	-99.00	3.00	0.43	3.00
2	2	2	2	55	1	3	2	1	3	3	3	4	4	4	4	3	4	3	4	-99	4	4	4	4	4	4	4	3	2	3	2	3	2	4	2	4	3	3	2	0.10	0.10	0.30	0.30	-99.00	0.30	-99.00	2.75	0.23	3.67
2	2	2	2	57	0	2	1	2	2	4	4	4	3	4	5	3	3	4	2	4	2	3	2	4	4	2	3	2	2	2	2	2	2	3	2	-99	3	2	2	0.30	0.70	0.50	0.70	-99.00	0.70	-99.00	2.18	0.57	3.00
2	2	2	2	86	0	3	1	1	-99	5	5	4	1	3	4	3	2	4	1	4	3	2	1	3	2	3	3	4	1	4	1	3	1	4	1	4	1	4	1	-99.00	0.70	0.70	0.90	0.90	0.90	-99.00	2.42	0.77	2.00
2	2	2	2	52	0	2	2	1	3	2	2	4	4	4	3	2	2	4	3	2	4	4	3	4	3	3	2	3	2	3	2	3	2	4	2	3	2	3	3	0.70	0.50	-99.00	0.50	0.90	0.70	-99.00	2.67	0.65	3.67
2	2	2	2	56	0	4	1	1	1	1	1	4	5	5	2	5	4	2	4	4	5	5	4	5	4	4	4	3	2	3	1	3	2	4	2	4	2	4	2	0.70	0.70	-99.00	0.70	0.50	0.70	-99.00	2.67	0.65	3.67
2	2	2	2	47	0	1	2	1	4	2	4	2	4	2	4	4	4	4	2	4	4	4	2	4	4	4	5	3	2	2	2	2	2	3	2	2	3	2	2	0.70	0.30	0.50	0.70	0.70	0.70	-99.00	2.25	0.57	4.00
2	2	2	2	20	0	2	2	1	4	5	4	2	2	4	2	2	3	3	2	4	2	3	4	4	2	4	4	1	2	2	2	1	2	3	2	2	2	2	2	0.70	0.70	0.70	0.70	0.70	0.70	-99.00	1.92	0.70	3.33
2	2	2	2	15	0	1	2	1	-99	2	4	4	4	3	4	4	4	3	3	4	3	4	3	4	3	4	4	3	3	3	2	3	2	2	2	3	2	2	3	0.50	0.70	0.70	0.70	0.90	0.70	-99.00	2.50	0.70	4.00
2	2	2	2	68	0	1	1	1	4	4	4	4	4	4	4	4	4	4	2	5	5	5	3	4	4	2	4	3	2	2	2	3	2	3	2	2	3	3	2	0.30	0.30	0.30	0.90	0.90	0.70	-99.00	2.42	0.50	4.00
2	2	2	1	73	0	4	1	1	4	1	4	4	4	4	4	4	4	4	2	5	5	5	3	4	4	2	4	3	3	3	2	3	2	3	2	2	3	2	2	0.50	0.30	0.30	0.90	0.90	0.70	-99.00	2.50	0.53	4.00
2	2	2	1	39	0	3	1	1	4	3	3	3	3	3	3	4	3	4	4	4	4	4	4	4	2	3	3	3	2	3	2	3	2	2	2	2	2	2	3	0.70	0.70	0.70	0.70	0.70	0.70	-99.00	2.33	0.70	3.67
2	2	2	2	31	1	4	2	1	2	1	3	4	2	2	3	2	2	4	1	2	1	3	3	3	2	1	2	2	3	4	2	3	4	2	2	2	2	3	3	0.90	0.70	0.70	0.70	-99.00	0.70	-99.00	2.67	0.73	2.33
2	2	2	2	29	0	3	1	1	4	1	2	2	4	2	4	4	4	1	2	2	3	4	3	4	2	2	2	1	1	1	1	1	1	1	1	1	1	1	1	0.90	0.90	0.90	0.90	0.90	0.90	-99.00	1.00	0.90	4.00
2	2	2	2	51	0	4	1	1	3	4	2	3	4	4	2	2	4	2	3	2	4	4	4	4	4	4	2	1	2	3	2	3	3	2	3	3	2	2	3	0.70	0.70	0.70	0.70	0.70	0.70	-99.00	2.42	0.70	3.67
2	2	2	1	72	0	-99	-99	-99	3	3	4	5	4	3	4	4	4	3	4	4	4	4	3	4	2	2	4	2	2	3	2	3	2	3	2	3	2	4	2	0.70	0.50	-99.00	0.70	0.70	0.70	-99.00	2.50	0.65	3.67
2	2	2	2	71	0	2	1	1	3	1	1	3	3	2	2	1	2	1	2	3	3	3	2	3	2	3	2	1	1	3	1	3	1	2	1	2	2	1	2	0.90	0.90	0.90	0.90	0.90	0.90	-99.00	1.67	0.90	3.00
2	2	2	2	38	0	4	1	1	2	2	1	2	2	4	4	3	2	3	4	4	5	5	3	5	5	4	4	4	3	3	2	4	1	2	2	2	2	2	2	0.70	0.70	0.50	0.50	0.50	0.90	-99.00	2.42	0.57	3.00
2	2	2	1	34	0	2	1	1	4	1	3	3	4	3	5	4	4	2	2	4	4	4	2	5	3	4	4	2	1	2	2	3	2	4	2	3	2	1	2	0.30	0.70	0.70	0.70	0.90	0.70	-99.00	2.17	0.67	4.33
2	2	2	2	37	0	2	1	1	2	2	2	3	2	4	2	2	4	4	3	3	-99	4	3	4	3	3	2	1	2	2	2	2	2	3	2	2	2	1	1	0.70	0.50	0.50	0.50	0.50	0.50	-99.00	1.83	0.53	2.67
2	2	2	2	45	0	3	1	1	5	2	4	3	2	3	4	3	2	2	3	4	2	2	4	2	4	3	4	3	2	4	3	2	2	3	3	3	3	2	2	0.70	0.70	0.70	0.70	0.70	0.70	-99.00	2.67	0.70	3.00
2	2	2	1	66	0	3	1	1	3	1	1	4	3	3	2	2	3	2	2	2	3	4	2	3	2	2	2	2	2	2	2	2	2	3	2	2	2	2	2	0.70	0.50	0.50	0.70	0.70	0.70	-99.00	2.08	0.60	3.00
2	2	2	2	65	1	2	1	1	3	2	3	3	2	2	4	3	3	4	2	3	3	-99	2	4	3	3	3	2	2	3	2	2	3	2	2	3	2	2	3	0.50	0.70	0.70	0.70	-99.00	0.50	-99.00	2.33	0.67	3.00
2	2	2	1	39	0	2	1	1	3	3	4	2	4	3	4	4	4	3	4	4	4	4	3	4	3	2	4	2	2	2	2	4	2	3	2	3	2	2	2	0.30	0.50	0.50	0.50	0.50	0.70	-99.00	2.33	0.47	3.67
2	2	2	2	62	1	2	1	1	4	2	4	4	2	2	4	4	2	4	4	4	4	3	2	4	2	2	2	2	1	2	1	3	2	2	1	2	2	2	1	0.90	0.90	-99.00	0.90	-99.00	0.70	-99.00	1.75	0.90	3.33
2	2	2	2	45	0	4	2	2	2	3	2	2	3	3	3	3	2	4	4	4	4	4	4	4	4	4	3	2	2	3	2	2	2	2	3	2	3	2	2	0.50	0.50	0.50	0.50	0.50	0.70	-99.00	2.25	0.50	3.00
2	2	2	1	26	0	2	2	1	4	1	3	4	3	4	2	4	3	2	3	3	4	4	2	4	1	2	3	4	2	3	2	2	2	1	2	2	2	2	2	0.90	0.70	0.70	0.70	0.70	0.70	-99.00	2.17	0.73	3.67
2	2	2	2	17	0	1	2	1	3	1	4	3	2	4	5	1	4	3	3	3	3	5	3	3	2	3	3	2	1	1	1	2	2	1	1	1	2	1	1	0.70	0.70	0.70	0.90	-99.00	0.90	-99.00	1.33	0.77	2.67
2	2	2	1	20	0	3	2	1	3	1	3	4	4	3	3	3	4	1	3	3	3	2	3	3	2	2	4	2	2	2	1	3	3	2	1	2	3	2	2	0.70	0.90	0.90	0.90	-99.00	0.70	-99.00	2.08	0.87	3.33
2	2	2	2	66	0	2	1	1	3	1	1	4	4	4	2	3	-99	2	2	3	3	4	2	-99	2	2	2	3	2	1	4	2	1	3	2	2	2	2	2	0.70	0.70	0.70	0.70	0.90	0.90	-99.00	2.17	0.73	3.50
2	2	2	1	70	0	2	1	1	3	1	1	4	4	4	2	3	4	3	2	4	3	4	3	4	3	2	2	3	2	1	1	1	4	3	1	2	2	2	2	0.90	0.50	0.70	0.70	0.90	0.90	-99.00	2.00	0.73	3.67
2	2	2	2	47	0	2	1	1	2	1	2	2	4	2	4	4	4	2	2	2	4	4	2	4	2	2	2	2	1	2	1	2	1	3	1	2	2	2	2	0.50	0.70	0.70	0.70	-99.00	0.90	-99.00	1.75	0.67	3.33
2	2	2	2	62	0	1	2	1	4	4	4	4	4	4	2	2	2	4	2	4	4	4	4	4	4	4	4	3	2	4	2	3	4	3	2	3	3	3	3	0.30	0.30	0.50	0.70	0.50	0.70	-99.00	2.92	0.47	4.00
2	2	2	2	42	0	2	2	1	2	1	5	2	5	2	5	5	2	2	1	5	4	4	2	5	4	5	5	3	4	1	4	4	4	4	2	3	4	2	4	0.70	0.70	-99.00	0.70	0.70	0.70	-99.00	3.25	0.70	4.00
2	2	2	2	45	0	4	1	2	4	3	2	4	4	4	4	4	5	4	4	5	4	4	4	5	4	4	4	2	3	3	2	3	3	3	2	3	3	4	4	0.70	0.70	0.50	0.50	0.30	0.70	-99.00	2.92	0.53	4.33
2	2	2	2	29	0	2	1	1	4	3	3	3	3	5	3	2	4	2	3	3	4	4	3	4	5	3	3	3	2	2	2	3	3	3	3	3	3	3	3	0.50	0.50	0.50	0.70	-99.00	0.70	-99.00	2.75	0.57	3.67
2	2	2	2	67	1	3	1	1	3	2	3	2	2	2	4	3	3	4	2	4	3	3	2	4	2	3	3	2	2	3	2	3	3	2	3	2	2	2	3	0.70	0.70	0.70	0.70	-99.00	0.70	-99.00	2.42	0.70	3.00
2	2	2	1	43	1	4	1	1	4	2	1	4	1	3	2	1	2	4	2	3	2	3	2	2	3	2	1	-99	-99	-99	-99	-99	-99	-99	-99	-99	-99	-99	-99	0.70	0.70	0.70	0.90	0.90	0.70	-99.00	-99.00	0.77	2.33
2	2	2	1	27	0	3	2	1	-99	-99	-99	-99	-99	-99	-99	-99	-99	-99	-99	-99	-99	-99	-99	-99	-99	-99	-99	2	1	1	1	1	4	3	1	2	1	1	2	0.90	0.90	0.90	0.90	0.90	0.70	-99.00	1.67	0.90	-99.00
2	2	2	1	45	0	2	2	2	3	2	3	4	4	3	3	3	3	4	3	5	3	3	3	5	5	4	3	3	3	3	3	3	3	2	3	2	2	2	2	0.70	0.70	0.70	0.70	0.90	0.90	-99.00	2.58	0.73	4.00
2	2	2	1	16	0	1	2	1	2	3	5	3	2	2	5	5	2	2	3	4	4	5	1	3	2	2	4	1	2	1	1	2	2	2	1	2	2	1	2	0.70	0.70	0.90	0.90	-99.00	0.50	-99.00	1.58	0.83	2.33
2	2	2	2	52	0	2	2	1	2	1	1	3	3	1	1	1	1	4	1	5	3	3	1	5	3	3	3	2	1	1	2	1	2	2	1	1	2	1	1	0.50	0.70	0.90	0.90	0.50	0.90	-99.00	1.42	0.73	3.33
2	2	2	1	52	1	1	1	1	2	2	4	2	2	2	4	3	4	2	3	4	2	3	2	3	2	2	3	2	2	3	3	3	3	2	2	3	3	2	3	0.50	0.70	0.70	0.70	0.70	0.70	-99.00	2.58	0.67	2.33
2	2	2	2	55	0	2	1	1	4	3	4	5	4	4	4	3	2	4	3	4	5	5	3	4	4	4	3	3	3	3	-99	4	3	3	2	3	3	3	3	0.50	0.50	0.70	0.70	0.90	0.70	-99.00	3.00	0.67	4.00
2	2	2	2	21	0	-99	2	1	4	1	5	5	5	5	3	4	4	5	2	4	5	5	3	3	5	4	3	3	2	3	2	4	2	3	2	4	3	2	4	0.50	0.30	0.30	0.70	-99.00	0.70	-99.00	2.83	0.47	4.00
2	2	2	2	19	0	2	2	2	5	1	5	5	4	4	5	4	3	2	4	5	4	4	4	4	4	4	4	3	4	4	3	4	1	4	4	3	4	3	4	0.70	0.30	0.30	0.70	0.70	0.50	-99.00	3.42	0.50	4.33
2	2	2	1	19	0	2	2	2	3	2	5	3	2	4	4	2	1	5	3	4	1	2	3	3	4	4	3	3	2	2	2	3	2	3	2	2	2	2	2	0.50	0.30	0.30	0.50	-99.00	0.70	-99.00	2.25	0.40	2.67
2	2	2	1	57	0	4	1	1	3	1	3	4	3	4	4	4	3	2	3	3	3	5	2	4	2	2	3	3	2	3	2	3	3	2	2	3	3	2	3	0.50	0.70	0.70	0.90	0.70	0.70	-99.00	2.58	0.70	3.33
2	2	2	2	32	0	4	1	1	2	1	5	1	5	3	5	2	4	5	2	5	5	5	2	4	3	4	5	-99	-99	-99	-99	-99	-99	-99	-99	-99	-99	-99	-99	0.50	0.70	0.90	0.90	0.50	-99.00	-99.00	-99.00	0.73	3.67
2	2	2	2	50	0	4	1	1	4	4	4	4	4	4	4	4	4	4	4	4	4	4	4	4	4	4	4	3	3	3	2	4	2	4	2	3	3	2	2	0.30	0.30	0.30	0.30	0.70	0.70	-99.00	2.75	0.37	4.00
2	2	2	1	54	0	3	1	1	2	2	2	4	2	4	3	2	2	4	2	2	2	2	1	4	2	3	2	1	1	1	2	1	2	1	2	2	2	1	2	0.30	0.70	0.70	0.70	0.70	0.70	-99.00	1.50	0.63	2.67
2	2	2	2	33	0	2	1	1	1	1	3	1	2	1	4	3	4	2	1	4	2	5	3	-99	1	3	1	3	2	2	2	3	2	2	2	2	2	2	2	0.50	0.50	0.70	0.70	0.90	0.90	-99.00	2.17	0.67	1.50
2	2	2	2	23	0	2	1	1	3	3	2	4	2	2	3	3	2	4	3	3	3	3	2	3	2	2	1	1	2	1	2	1	1	2	1	1	2	1	2	0.70	0.70	0.50	0.90	-99.00	0.90	-99.00	1.42	0.70	2.67
2	2	2	1	23	0	2	1	1	4	1	5	4	3	3	5	4	4	4	1	5	4	5	1	4	4	4	3	-99	-99	-99	-99	-99	-99	-99	-99	-99	-99	-99	-99	0.50	0.30	0.30	0.50	0.70	0.50	-99.00	-99.00	0.43	3.67
2	2	2	2	36	0	2	1	1	5	3	2	5	4	4	2	3	3	3	3	4	5	5	3	5	4	3	3	2	1	2	2	2	2	2	2	2	2	1	2	0.70	0.50	0.50	0.70	0.50	0.90	-99.00	1.83	0.57	4.67
2	2	2	2	37	1	1	1	1	4	1	4	1	2	2	3	3	4	3	2	4	4	4	2	3	4	2	4	3	2	2	2	2	2	2	2	3	2	3	3	0.70	0.50	0.70	0.70	-99.00	0.70	-99.00	2.33	0.67	3.00
2	2	2	2	57	1	3	2	1	4	2	3	4	4	4	3	3	1	4	3	4	4	4	3	2	4	3	3	2	2	2	2	3	2	3	2	2	2	2	2	0.70	0.30	0.50	0.70	-99.00	0.70	-99.00	2.17	0.57	3.33
2	2	2	1	61	0	3	1	1	4	1	4	4	4	2	3	4	4	2	2	4	3	3	2	3	2	3	2	2	2	3	1	2	2	2	2	2	2	2	3	0.70	-99.00	0.70	0.70	0.70	0.70	-99.00	2.08	0.70	3.67
2	2	2	1	67	0	2	1	1	4	1	4	2	4	4	4	4	4	2	1	4	4	4	3	3	3	3	3	2	2	1	2	2	2	2	2	1	2	1	2	0.30	0.50	0.50	0.70	0.70	0.70	-99.00	1.75	0.53	3.67
2	2	2	2	68	0	2	1	1	2	2	3	2	4	4	3	2	2	3	2	2	3	3	2	3	2	2	2	2	2	1	2	2	2	-99	2	2	2	1	2	0.30	0.70	0.70	0.90	0.90	0.90	-99.00	1.82	0.70	3.00
2	2	2	2	43	0	-99	2	1	-99	2	2	2	2	3	2	1	2	4	1	2	4	4	2	4	4	4	2	3	-99	3	-99	3	-99	3	3	3	3	-99	3	0.70	0.70	-99.00	0.70	0.70	0.70	-99.00	3.00	0.70	3.00
2	2	2	1	56	1	2	2	1	3	2	4	4	4	4	2	3	2	4	2	4	2	3	2	4	4	3	2	2	2	2	1	2	2	2	2	2	3	2	2	0.50	0.70	0.50	0.70	-99.00	0.70	-99.00	2.00	0.60	3.67
2	2	2	2	72	0	2	1	1	2	1	4	4	4	4	2	2	1	2	2	2	4	4	-99	2	-99	2	4	4	1	4	1	3	1	4	1	4	1	2	1	0.90	0.70	0.90	0.90	0.90	0.70	-99.00	2.25	0.87	2.67
2	2	2	2	37	0	2	1	1	2	4	2	4	2	4	2	2	2	2	4	4	4	5	2	4	2	4	4	-99	-99	-99	-99	-99	-99	-99	-99	-99	-99	-99	-99	0.90	0.70	0.70	0.90	0.70	0.70	-99.00	-99.00	0.77	2.67
2	2	2	2	58	0	4	1	1	5	2	3	4	5	5	3	4	4	3	3	5	4	4	1	4	3	3	2	2	2	4	1	4	2	3	2	2	1	2	3	0.70	0.70	0.50	0.70	0.90	0.70	-99.00	2.33	0.67	4.67
2	2	2	1	60	0	4	1	1	4	2	1	5	2	4	1	1	2	2	3	4	5	5	2	4	2	1	1	2	1	-99	1	4	3	1	1	2	1	1	4	0.90	0.90	0.90	0.90	0.90	0.90	-99.00	1.91	0.90	3.33
2	2	2	2	28	1	3	1	1	4	2	4	5	4	4	4	4	1	3	1	4	4	5	1	4	2	1	2	2	2	1	1	3	1	3	1	1	2	1	2	0.90	0.70	0.70	0.90	-99.00	0.90	-99.00	1.67	0.80	4.00
2	2	2	2	22	0	2	1	1	3	2	4	4	4	5	1	2	2	5	2	5	3	4	3	5	5	5	1	4	2	2	2	3	2	4	2	3	4	2	1	0.50	0.30	0.30	0.10	0.10	0.70	-99.00	2.58	0.27	4.00
2	2	2	2	33	0	2	1	1	3	1	4	4	3	4	4	4	3	4	3	4	4	5	2	4	2	2	4	2	2	1	2	2	4	3	2	2	2	2	2	0.70	0.70	0.90	0.70	0.70	0.70	-99.00	2.17	0.77	3.33
2	2	2	2	44	1	2	2	1	4	1	4	3	2	1	4	4	2	4	2	4	4	4	2	4	2	2	2	2	2	2	3	2	2	3	2	3	3	2	2	0.70	0.50	0.50	0.90	0.30	0.90	-99.00	2.33	0.57	3.33
2	2	2	2	53	1	2	2	1	4	2	2	3	4	4	2	2	2	4	4	2	3	4	4	4	5	3	2	4	2	-99	3	2	1	3	2	3	3	2	2	0.70	0.70	0.70	0.70	-99.00	0.90	-99.00	2.45	0.70	4.00
2	2	2	2	53	0	1	2	1	2	4	4	4	5	4	5	1	1	2	1	5	-99	5	4	4	5	5	5	3	2	4	2	4	2	3	2	3	2	2	3	0.30	0.50	-99.00	0.70	0.70	0.70	-99.00	2.67	0.55	3.67
2	2	2	2	22	0	2	1	1	2	1	5	1	5	2	5	5	4	5	4	5	3	4	4	4	5	5	5	2	4	-99	4	2	3	4	4	2	4	3	4	0.70	0.30	0.30	0.70	0.70	0.70	-99.00	3.27	0.50	3.67
2	2	2	2	23	0	2	2	2	4	-99	1	4	4	5	1	2	4	2	1	3	1	1	1	5	3	2	3	1	1	1	2	1	2	3	2	2	2	1	2	0.50	0.70	0.70	0.70	0.50	0.70	-99.00	1.67	0.63	4.33
2	2	2	2	31	0	4	2	1	2	3	3	3	3	4	2	2	2	3	2	4	4	4	3	4	3	3	1	2	2	2	2	3	2	3	2	2	2	2	2	0.70	0.50	0.70	0.70	0.70	0.70	-99.00	2.17	0.67	3.00
2	2	2	1	28	0	4	-99	1	2	4	2	3	2	4	3	4	5	2	4	5	2	4	4	2	3	5	4	2	3	3	2	3	2	3	3	2	3	2	3	0.90	0.50	0.50	0.90	0.50	0.70	-99.00	2.58	0.63	2.00
2	2	2	2	27	0	3	2	1	2	2	1	4	3	3	2	2	3	2	3	3	4	4	2	4	4	3	2	2	1	1	2	2	1	2	2	2	2	1	1	0.70	0.70	-99.00	0.90	0.90	0.90	-99.00	1.58	0.80	3.00
2	2	2	2	74	0	2	1	1	4	1	3	3	3	3	3	5	3	2	2	4	3	4	2	3	3	5	2	1	2	2	2	1	2	3	2	2	2	1	3	0.70	0.70	0.70	0.70	0.90	0.70	-99.00	1.92	0.73	3.33
2	2	2	1	74	0	1	1	1	2	2	3	4	4	3	2	3	2	3	2	2	3	4	3	3	3	2	3	3	1	3	2	3	2	3	2	2	2	2	2	0.70	0.90	0.70	0.70	0.90	0.70	-99.00	2.25	0.77	3.00
2	2	2	1	56	0	3	1	1	4	1	3	4	1	4	5	3	3	3	1	3	3	4	2	4	3	1	3	1	1	1	1	1	1	2	1	1	2	1	2	0.90	0.90	0.90	0.90	0.90	0.90	-99.00	1.25	0.90	3.00
2	2	2	2	54	0	2	1	1	4	2	4	2	3	3	4	4	2	4	3	4	2	3	2	2	4	4	4	3	3	3	3	3	3	3	3	3	3	3	3	0.50	0.30	0.30	0.50	0.50	0.50	-99.00	3.00	0.40	3.00
2	2	2	2	52	1	2	1	1	3	3	4	4	4	2	1	5	5	3	2	3	3	3	2	3	2	2	3	2	2	3	3	3	3	1	3	2	3	3	3	0.50	0.50	0.50	0.50	0.70	0.70	-99.00	2.58	0.53	3.33
2	2	2	2	66	0	1	1	1	2	1	2	2	2	2	2	2	2	4	1	-99	5	5	4	1	1	1	2	3	2	-99	3	3	1	4	1	3	2	-99	2	0.50	0.50	0.50	0.90	0.90	0.90	-99.00	2.40	0.63	1.67
2	2	2	2	46	0	4	1	1	2	2	1	5	5	5	1	3	5	4	3	5	3	3	1	3	3	3	5	1	2	3	3	3	2	3	2	2	2	2	2	0.70	0.30	0.50	0.90	0.30	0.30	-99.00	2.25	0.53	3.33
2	2	2	1	51	1	1	1	1	4	2	3	3	4	3	2	2	2	4	3	2	4	4	3	4	4	2	4	3	2	3	2	3	2	3	2	3	2	3	3	0.50	0.50	0.70	0.30	-99.00	0.50	-99.00	2.58	0.50	4.00
2	2	2	2	42	0	2	2	1	3	3	2	4	3	4	3	4	3	3	2	4	4	4	3	3	3	2	3	2	1	2	2	2	2	4	3	3	3	3	2	0.50	0.30	0.50	0.70	0.30	0.70	-99.00	2.42	0.47	3.00
2	2	2	2	50	1	3	1	1	3	2	4	4	5	3	4	4	4	3	3	4	5	5	2	4	2	3	4	2	2	3	2	3	2	3	2	2	2	1	2	0.90	0.70	0.50	0.90	-99.00	0.90	-99.00	2.17	0.73	4.00
2	2	2	1	61	1	2	1	1	2	2	1	3	2	2	1	1	2	4	2	1	2	2	2	2	3	2	1	1	2	2	3	3	2	3	2	2	2	2	3	0.50	0.30	0.30	0.30	0.50	0.50	-99.00	2.25	0.37	2.00
2	2	2	2	23	0	1	2	2	2	2	2	2	2	2	3	2	2	4	3	3	2	3	2	2	2	3	2	2	2	2	2	2	2	2	2	2	2	1	2	0.70	0.70	0.70	0.70	0.70	0.70	-99.00	1.92	0.70	2.00
2	2	2	2	37	0	3	1	1	3	4	4	3	3	4	3	2	4	5	4	4	2	3	4	4	4	5	3	2	2	3	3	3	2	4	3	3	3	2	3	0.70	0.50	0.30	-99.00	0.30	0.50	-99.00	2.75	0.40	3.33
2	2	2	2	48	0	4	1	1	3	3	1	4	4	4	2	2	2	4	4	2	5	5	2	5	4	2	2	1	1	2	2	2	2	1	1	1	2	2	2	0.30	0.70	0.70	0.90	0.90	0.90	-99.00	1.58	0.70	4.00
2	2	2	1	68	0	1	1	2	4	2	2	4	3	4	4	2	2	3	3	3	3	4	3	4	3	3	3	2	2	2	2	3	2	2	2	2	2	1	2	0.70	0.50	0.50	0.70	0.90	0.70	-99.00	2.00	0.63	3.67
2	2	2	2	60	0	1	1	2	3	2	3	3	4	3	3	3	3	2	2	3	3	4	3	3	2	2	3	2	2	2	2	3	2	2	2	2	2	2	1	0.70	0.70	0.70	0.70	0.70	0.70	-99.00	2.00	0.70	3.33
2	2	2	1	40	1	4	2	1	4	1	1	4	5	5	3	2	2	1	2	4	5	5	1	5	5	2	1	2	1	1	2	2	1	1	1	3	2	1	1	0.70	0.90	0.90	0.90	-99.00	0.90	-99.00	1.50	0.87	4.67
2	2	2	1	63	0	1	1	2	4	1	2	4	5	5	2	5	2	1	1	4	5	5	3	5	5	5	5	4	1	4	2	3	2	1	2	3	2	1	2	0.70	0.70	0.70	0.70	0.90	0.70	-99.00	2.25	0.73	4.67
2	2	2	2	78	1	1	1	1	4	3	2	3	5	2	3	-99	1	5	2	-99	-99	-99	-99	-99	-99	-99	-99	-99	-99	-99	-99	-99	-99	-99	-99	-99	-99	-99	-99	0.70	0.70	0.70	0.70	-99.00	0.70	-99.00	-99.00	0.70	4.50
2	2	2	2	37	0	3	1	1	2	1	3	3	2	2	3	2	3	4	2	3	2	3	2	3	2	2	2	4	2	2	2	2	2	3	-99	2	2	-99	2	0.70	0.70	0.50	0.70	0.50	0.50	-99.00	2.30	0.60	2.33
2	2	2	2	54	0	3	1	1	2	3	4	2	4	4	4	2	4	1	4	3	4	3	2	4	3	3	4	1	1	1	1	1	1	2	1	2	1	1	2	0.70	0.70	0.70	0.70	0.90	0.90	-99.00	1.25	0.73	3.33
2	2	2	1	55	0	2	1	1	4	3	4	3	4	4	4	3	4	3	3	3	4	4	2	3	3	4	3	1	-99	1	1	2	1	2	1	2	2	1	1	0.70	0.50	0.70	0.90	0.90	0.90	-99.00	1.36	0.73	3.67
2	2	2	2	27	0	3	2	2	4	1	4	1	3	4	1	1	4	4	1	5	4	5	3	5	3	5	3	2	3	2	3	3	2	3	3	2	3	2	1	0.30	0.30	0.30	0.70	0.70	0.50	-99.00	2.42	0.43	4.00
2	2	2	2	26	0	2	1	1	5	3	4	5	5	4	2	3	4	2	1	4	5	5	4	5	3	4	3	4	2	4	1	2	4	4	1	2	4	2	4	0.30	0.30	0.50	0.30	0.90	0.30	-99.00	2.83	0.47	5.00
2	2	2	2	21	0	1	2	1	3	2	2	3	3	3	2	2	3	4	3	4	3	4	2	4	2	2	2	2	2	2	2	2	2	2	2	2	2	2	2	0.70	0.50	0.50	0.70	0.90	0.70	-99.00	2.00	0.63	3.33
2	2	2	2	15	0	1	2	2	5	2	5	5	5	5	4	5	5	4	3	5	-99	4	2	5	5	5	5	3	3	3	2	3	2	3	3	3	2	3	2	0.30	0.50	0.30	0.70	-99.00	0.70	-99.00	2.67	0.47	5.00
2	2	2	2	65	1	3	2	1	5	2	4	5	4	4	3	4	4	5	3	4	5	4	4	4	5	3	3	3	3	2	4	3	2	4	2	3	3	2	2	0.50	0.30	0.10	0.50	-99.00	0.30	-99.00	2.75	0.33	4.33
2	2	2	1	42	0	2	1	2	3	2	1	5	-99	5	1	3	3	3	3	4	5	5	4	5	3	3	4	2	2	2	1	3	1	3	1	2	1	1	1	0.70	0.70	-99.00	0.70	0.30	0.90	-99.00	1.67	0.60	4.00
2	2	2	2	19	1	2	2	1	2	1	4	3	5	4	5	5	5	2	3	5	5	5	3	4	5	3	4	2	2	1	1	2	2	4	1	2	1	2	2	0.50	0.50	-99.00	0.70	0.90	0.70	-99.00	1.83	0.65	3.67
2	2	2	2	18	0	1	2	2	3	2	3	4	2	3	3	3	2	3	1	2	3	4	2	3	4	3	3	2	1	1	2	2	2	3	2	2	2	2	2	0.70	0.70	0.90	0.90	-99.00	0.70	-99.00	1.92	0.83	2.67
2	2	2	1	14	0	1	2	2	3	1	4	3	3	2	3	2	4	3	3	2	2	3	3	4	3	3	2	2	2	2	1	3	2	2	1	3	3	1	2	0.90	0.70	0.90	0.70	-99.00	0.70	-99.00	2.00	0.80	3.33
2	2	2	2	46	0	2	2	1	2	2	2	1	1	1	3	2	3	3	3	2	4	4	3	4	3	3	3	1	2	2	2	3	2	3	2	3	2	2	2	0.50	0.90	0.90	0.90	0.70	0.70	-99.00	2.17	0.80	2.33
2	2	2	2	40	1	4	1	1	2	1	2	4	2	2	2	1	1	2	2	2	1	1	1	1	1	1	3	3	2	2	2	2	2	3	2	2	2	2	2	0.90	0.90	0.90	0.90	-99.00	0.90	-99.00	2.17	0.90	1.67
2	2	2	2	53	0	2	1	1	2	1	2	4	4	2	2	2	2	2	2	2	5	5	2	4	2	2	2	2	1	2	2	2	2	2	2	1	2	1	1	0.70	0.70	0.90	0.90	0.70	0.90	-99.00	1.67	0.80	3.33
2	2	2	2	20	0	2	1	1	4	1	1	4	1	3	2	1	1	3	3	2	3	4	3	3	2	2	1	1	2	3	1	1	1	2	1	1	2	1	1	0.90	0.70	0.90	0.90	-99.00	0.90	-99.00	1.42	0.87	2.67
2	2	2	2	16	0	-99	-99	1	3	3	2	4	4	4	2	3	3	3	3	4	3	4	3	4	3	3	3	2	1	2	1	2	2	3	2	2	2	2	2	0.70	0.70	0.70	0.70	-99.00	0.70	-99.00	1.92	0.70	3.67
2	2	2	2	28	0	3	1	1	2	2	1	4	3	4	2	3	2	3	3	3	3	4	3	4	4	3	2	2	1	-99	2	2	1	2	2	2	2	2	2	0.90	0.90	0.90	0.70	0.70	0.70	-99.00	1.82	0.83	3.00
2	2	2	1	56	1	1	1	1	3	2	2	3	3	2	2	2	2	2	2	2	3	4	2	3	2	2	2	2	2	2	2	2	2	2	2	2	2	2	2	0.70	0.70	0.70	0.70	0.70	0.70	-99.00	2.00	0.70	3.00
2	2	2	1	59	0	2	1	2	4	2	4	4	3	2	4	4	4	4	2	4	4	3	3	4	2	4	3	2	3	3	2	3	3	2	-99	3	2	2	3	0.70	0.70	0.70	0.70	0.50	0.70	-99.00	2.55	0.67	3.67
2	2	2	1	33	0	4	1	1	2	2	2	4	4	3	5	5	5	1	3	1	3	4	2	3	1	1	4	1	2	2	1	2	2	2	2	2	2	2	3	0.90	0.90	0.90	0.90	0.90	0.90	-99.00	1.92	0.90	3.00
2	2	2	2	34	0	4	1	1	1	1	2	1	2	1	3	2	2	3	2	2	4	4	1	4	1	1	1	1	1	2	2	2	2	2	2	2	2	2	3	0.70	0.90	0.90	0.90	0.90	0.70	-99.00	1.92	0.87	2.33
2	2	2	1	32	0	4	1	1	3	2	4	4	2	4	4	4	4	2	3	4	4	4	3	4	2	3	4	2	2	4	1	2	2	2	2	2	2	2	2	0.70	0.70	0.70	0.70	0.70	0.70	-99.00	2.08	0.70	3.00
2	2	2	2	29	0	3	1	1	2	1	2	3	2	3	2	2	2	2	2	2	3	4	2	4	3	2	2	2	2	2	2	2	2	3	2	2	2	2	3	0.70	0.90	0.90	0.90	0.90	0.70	-99.00	2.17	0.87	2.67
2	2	2	2	29	0	4	1	1	4	1	2	2	2	4	4	4	2	4	2	2	4	4	2	4	2	2	2	1	1	2	2	2	2	2	2	1	1	1	2	0.70	0.70	0.70	0.70	0.90	0.70	-99.00	1.58	0.73	3.33
2	2	2	1	25	0	4	1	1	2	1	4	3	3	3	4	4	4	2	2	3	4	4	3	4	2	2	2	1	3	2	2	3	2	2	2	3	3	2	2	0.70	0.90	0.90	0.90	0.90	0.90	-99.00	2.25	0.87	3.00
2	2	2	2	28	0	1	2	2	2	1	4	4	3	2	2	2	2	3	3	2	4	4	3	4	4	4	2	3	3	1	3	3	3	2	4	2	3	3	2	0.30	0.50	0.30	0.30	0.10	0.50	-99.00	2.67	0.30	3.00
2	2	2	2	19	0	2	1	1	3	5	3	3	3	4	4	4	2	5	5	4	4	5	2	5	5	5	3	3	1	2	2	3	1	3	1	1	2	1	1	0.70	0.10	0.50	0.70	0.10	0.70	-99.00	1.75	0.43	3.67
2	2	2	1	39	0	2	1	1	2	3	4	3	5	4	5	1	1	1	3	5	-99	5	1	4	2	2	5	3	2	2	2	2	1	2	2	2	3	1	2	0.70	0.70	0.90	0.90	0.90	0.70	-99.00	2.00	0.83	3.67
2	2	2	1	62	0	4	1	1	2	1	2	5	2	3	5	4	2	2	2	4	2	3	2	3	2	2	2	1	2	3	2	3	2	2	2	2	2	2	3	0.90	0.90	0.70	0.90	0.70	0.90	-99.00	2.17	0.80	2.33
2	2	2	2	62	0	4	1	1	3	2	3	3	4	3	2	4	4	3	3	3	4	4	3	4	3	3	3	2	2	2	2	2	3	2	2	2	2	2	3	0.70	0.70	0.70	0.70	0.70	0.70	-99.00	2.17	0.70	3.67
2	2	2	2	40	0	2	1	1	4	2	5	3	4	3	3	2	4	4	4	5	4	4	3	4	4	2	4	3	4	4	3	4	4	3	4	3	3	3	3	0.50	0.30	0.30	0.30	0.70	0.10	-99.00	3.42	0.40	4.00
2	2	2	2	37	0	4	1	1	4	1	4	2	4	3	4	3	2	2	1	4	5	5	2	4	2	2	4	2	2	2	2	2	2	3	2	2	2	2	2	0.70	0.50	0.50	0.50	0.70	0.70	-99.00	2.08	0.57	4.00
2	2	2	1	52	0	3	1	1	3	2	4	3	4	3	5	4	4	4	3	4	4	4	3	3	2	3	4	1	2	2	2	2	2	3	1	2	2	2	2	0.70	0.70	0.70	0.90	0.90	0.70	-99.00	1.92	0.77	3.33
2	2	2	2	47	0	4	1	1	1	1	4	4	1	4	2	4	4	1	2	1	2	4	1	3	1	1	2	3	1	3	1	1	2	1	1	3	2	1	2	0.70	0.90	0.90	0.90	0.90	0.90	-99.00	1.75	0.87	1.67
2	2	2	2	21	0	2	1	1	3	2	3	4	4	4	3	2	3	4	3	4	5	4	2	4	4	4	3	1	1	3	1	1	2	2	2	2	2	1	2	0.50	0.70	0.50	0.90	-99.00	0.70	-99.00	1.67	0.67	3.67
2	2	2	2	16	0	1	1	1	2	2	3	3	3	2	5	4	4	4	1	4	3	5	2	3	3	3	3	1	1	3	1	1	1	3	1	2	2	1	2	0.70	0.50	0.70	0.30	0.50	0.90	-99.00	1.58	0.57	2.67
2	2	2	2	57	0	4	2	1	2	3	2	2	4	2	2	2	4	3	2	3	2	2	3	2	2	2	2	2	2	2	2	3	2	2	2	2	2	2	2	0.70	0.70	0.50	0.70	0.70	0.70	-99.00	2.08	0.63	2.67
2	2	2	1	58	1	2	1	1	3	4	2	4	3	4	2	2	2	2	3	2	3	4	3	3	2	2	2	2	1	3	2	2	2	2	2	2	2	2	1	0.70	0.70	0.70	0.90	0.70	0.70	-99.00	1.92	0.73	3.00
2	2	2	1	29	0	2	2	1	4	2	1	2	2	4	2	2	4	4	4	4	2	4	1	3	2	1	2	1	1	1	1	3	2	3	1	1	2	1	1	0.50	0.70	0.70	0.70	0.70	0.70	-99.00	1.50	0.67	3.00
2	2	2	2	35	0	4	2	1	4	3	4	4	3	4	4	3	3	5	2	3	2	2	3	3	4	3	2	3	3	2	2	3	2	3	2	2	2	2	3	0.50	0.30	0.50	0.70	0.70	0.50	-99.00	2.42	0.53	3.33
2	2	2	2	52	0	2	2	1	4	4	4	3	4	2	3	3	3	3	4	4	4	4	2	4	4	2	3	2	1	2	2	2	2	3	2	3	2	1	2	0.50	0.50	0.50	0.90	-99.00	0.90	-99.00	2.00	0.63	4.00
2	2	2	2	27	0	2	1	1	4	4	4	3	3	3	4	4	4	3	3	4	4	5	3	5	4	2	3	2	2	3	2	3	2	2	2	2	2	2	2	0.30	0.50	0.50	0.90	-99.00	0.70	-99.00	2.17	0.60	4.00
2	2	2	2	29	0	2	1	1	4	2	3	4	2	4	4	3	3	2	2	3	4	4	2	4	3	2	3	2	2	2	2	3	2	3	2	2	2	2	2	0.70	0.70	0.70	0.70	0.90	0.90	-99.00	2.17	0.73	3.33
2	2	2	1	57	1	2	2	2	3	3	3	2	3	4	3	2	3	3	3	3	-99	3	3	4	2	2	3	2	2	3	1	3	2	3	2	2	2	2	2	0.50	0.70	0.70	0.70	-99.00	0.50	-99.00	2.17	0.67	3.33
2	2	2	2	22	0	2	-99	1	3	2	3	2	3	3	4	3	3	3	2	4	3	5	1	3	2	2	2	2	1	2	1	2	2	2	2	2	2	1	2	0.50	0.70	0.70	0.70	0.70	0.70	-99.00	1.75	0.67	3.00
2	2	2	1	59	0	2	1	1	2	3	4	4	4	4	5	4	2	2	3	4	4	4	3	4	2	3	4	3	3	2	2	3	3	3	3	3	3	3	3	0.70	0.70	0.50	0.70	0.50	0.70	-99.00	2.83	0.60	3.33
2	2	2	2	57	0	1	1	1	2	2	-99	3	2	2	2	2	2	3	3	2	2	3	2	3	3	2	2	3	3	2	2	2	3	4	2	2	2	2	2	0.50	0.70	0.70	0.70	0.50	0.70	-99.00	2.42	0.63	2.33
2	2	2	2	38	0	2	1	1	3	2	1	4	4	3	2	2	3	4	3	4	4	5	2	4	4	3	3	3	2	3	1	2	2	3	2	2	2	2	2	0.50	0.70	0.70	0.70	0.70	0.70	-99.00	2.17	0.67	3.67
2	2	2	2	66	0	1	1	1	1	2	3	2	4	2	4	4	2	4	1	4	2	3	2	2	2	2	2	2	2	4	2	2	2	3	2	2	3	2	2	0.50	0.50	0.50	0.90	0.70	0.70	-99.00	2.33	0.60	2.33
2	2	2	1	68	0	2	1	1	4	1	5	4	5	3	5	5	4	2	3	5	3	4	3	4	4	3	4	3	4	2	2	2	2	3	2	3	3	3	3	0.90	0.50	0.70	0.70	0.50	0.90	-99.00	2.67	0.67	4.33
2	2	2	1	43	0	4	1	1	4	4	3	4	3	4	4	3	4	3	4	4	3	3	4	4	4	4	3	3	2	2	3	3	2	3	2	3	2	2	2	0.70	0.70	0.70	0.70	0.70	0.70	-99.00	2.42	0.70	3.67
2	2	2	2	55	1	2	1	1	3	2	3	4	3	3	3	3	1	4	2	1	3	3	3	3	3	2	3	4	3	4	2	4	3	3	3	2	3	2	3	0.30	0.30	0.50	0.50	-99.00	0.50	-99.00	3.00	0.43	3.00
2	2	2	2	32	0	2	1	1	2	4	2	3	2	3	2	3	4	3	3	2	2	3	2	2	3	2	3	2	2	2	2	2	1	2	2	2	3	2	2	0.50	0.30	0.30	0.30	0.50	0.70	-99.00	2.00	0.37	2.00
2	2	2	2	27	0	1	1	1	5	1	4	4	4	5	5	5	5	3	1	5	-99	5	5	1	5	5	5	4	4	4	4	4	4	4	4	4	4	3	4	0.70	0.50	0.50	0.50	0.70	0.90	-99.00	3.92	0.57	3.33
2	2	2	1	39	0	2	1	1	4	4	4	4	4	2	4	4	4	4	4	4	4	4	4	4	2	2	3	3	3	3	3	3	3	2	3	3	3	3	3	0.50	0.70	0.70	0.70	0.70	0.50	-99.00	2.92	0.67	4.00
2	2	2	2	41	1	2	1	2	4	1	2	4	4	4	2	2	2	4	4	3	5	5	4	4	4	4	2	-99	1	2	1	2	2	4	1	2	2	1	2	0.30	0.30	0.30	0.50	-99.00	0.90	-99.00	1.82	0.37	4.00
2	2	2	2	57	1	1	2	1	-99	2	-99	5	3	4	2	1	3	3	3	2	3	3	3	4	3	1	3	2	1	3	1	2	1	3	2	2	2	2	1	0.50	0.70	0.70	0.90	0.50	0.90	-99.00	1.83	0.67	3.50
2	2	2	2	45	0	2	1	1	3	1	1	1	2	2	2	2	3	3	3	3	3	5	2	3	3	3	2	2	1	1	1	4	2	3	2	2	2	1	2	0.50	0.50	0.70	0.90	0.90	0.90	-99.00	1.92	0.70	2.67
2	2	2	2	59	1	2	1	1	3	3	3	4	3	3	3	4	3	3	3	2	3	4	2	3	2	2	2	2	1	2	1	2	2	2	2	2	2	2	2	0.70	0.70	0.70	0.70	-99.00	0.70	-99.00	1.83	0.70	3.00
2	2	2	1	38	0	1	1	1	5	2	3	4	2	2	3	4	2	2	2	2	4	5	1	2	1	1	1	1	1	1	1	1	1	1	1	1	1	1	1	0.70	0.90	0.90	0.70	0.90	0.90	-99.00	1.00	0.83	3.00
2	2	2	2	23	0	2	1	2	3	1	1	3	2	4	2	2	1	5	2	4	2	3	1	3	2	4	4	2	2	2	2	1	1	2	2	4	2	1	1	0.90	0.70	0.90	0.90	0.70	0.90	-99.00	1.83	0.83	2.67
2	2	2	2	73	0	2	1	1	3	2	2	2	2	3	4	4	4	4	2	4	4	4	2	4	3	4	2	2	2	2	1	3	2	2	2	2	2	2	2	0.50	0.70	-99.00	0.70	0.70	0.90	-99.00	2.00	0.65	3.00
2	2	2	1	52	1	2	1	1	1	1	2	2	2	3	4	3	3	2	2	2	2	4	2	2	2	2	3	2	2	2	2	2	2	2	2	2	2	2	2	0.90	0.90	0.90	0.90	-99.00	0.70	-99.00	2.00	0.90	1.67
2	2	2	2	22	1	2	1	1	2	2	2	3	3	4	2	2	2	2	4	2	5	5	1	3	4	1	4	1	2	1	1	1	1	1	2	1	1	1	1	0.70	0.70	0.90	0.90	0.90	0.90	-99.00	1.17	0.83	2.67
2	2	2	1	66	0	2	1	1	4	2	1	5	5	2	3	1	3	2	3	2	4	5	1	2	2	3	2	1	1	3	2	2	1	4	1	2	2	1	2	0.50	-99.00	0.70	0.90	0.70	0.90	-99.00	1.83	0.67	3.67
2	2	2	2	28	0	2	1	1	4	1	4	5	5	5	5	5	2	5	4	5	5	4	4	5	5	5	4	4	3	3	2	4	4	3	3	3	2	3	3	0.50	0.30	0.30	0.50	0.70	0.50	-99.00	3.08	0.43	4.67
2	2	2	1	30	0	1	2	1	1	1	3	5	3	3	2	3	1	1	1	3	2	3	3	2	1	1	5	2	2	3	4	3	3	3	3	2	2	1	3	0.70	0.90	0.90	0.90	0.90	0.50	-99.00	2.58	0.87	2.00
2	2	2	1	61	0	2	2	2	4	1	2	5	5	5	2	3	3	2	4	2	4	4	4	4	4	4	4	4	1	2	1	2	1	4	2	3	2	2	2	0.90	0.90	0.90	0.90	0.90	0.90	-99.00	2.17	0.90	4.33
2	2	2	2	43	0	2	2	1	5	3	2	4	5	4	2	2	4	3	2	3	5	4	2	4	4	2	3	2	2	2	2	2	2	3	2	3	3	3	3	0.50	0.70	0.50	0.70	0.10	0.70	-99.00	2.42	0.50	4.67
2	2	2	2	36	0	2	2	1	4	1	3	3	5	4	1	5	4	3	3	5	5	5	3	5	3	2	3	4	3	3	3	3	2	3	2	3	3	1	2	0.70	0.50	0.50	0.70	0.70	0.70	-99.00	2.67	0.60	4.67
2	2	2	2	44	0	4	1	1	2	2	2	4	3	4	2	2	3	2	4	2	3	4	2	2	2	2	2	3	-99	3	2	2	2	2	2	-99	2	3	3	0.70	0.90	0.90	0.70	0.70	0.90	-99.00	2.40	0.80	2.33
2	2	2	2	54	0	3	2	1	2	1	2	2	2	2	2	3	2	2	1	2	2	4	1	3	1	3	2	-99	-99	-99	-99	-99	-99	-99	-99	-99	-99	-99	-99	0.70	0.70	0.70	0.70	0.70	0.70	-99.00	-99.00	0.70	2.33
2	2	2	2	30	0	2	2	1	2	2	2	4	4	4	2	2	2	4	2	2	4	4	2	4	4	4	4	2	2	2	2	2	2	3	2	2	2	2	3	0.70	0.70	0.70	0.70	0.70	0.70	-99.00	2.17	0.70	3.33
2	2	2	2	61	0	2	1	1	1	3	1	4	5	3	2	3	2	2	3	1	4	4	3	4	3	3	2	1	1	2	2	3	2	2	2	1	2	1	1	0.50	0.70	0.70	0.70	0.70	0.70	-99.00	1.67	0.67	3.33
2	2	2	1	47	0	4	1	1	2	3	4	4	4	3	4	3	4	3	4	4	4	4	3	4	4	3	3	4	3	3	3	3	3	3	3	3	3	2	3	0.70	0.70	0.50	0.50	0.50	0.50	-99.00	3.00	0.57	3.33
2	2	2	2	47	0	4	1	1	4	3	4	4	4	3	4	4	5	2	4	4	3	4	4	4	4	3	4	3	3	4	2	4	3	3	2	3	3	2	3	0.50	0.30	0.30	0.50	0.50	0.50	-99.00	2.92	0.40	4.00
2	2	2	2	23	0	2	1	2	1	1	5	4	3	3	5	2	3	2	1	5	3	5	1	3	3	1	3	1	1	2	2	2	2	3	2	1	1	1	2	0.50	0.50	0.30	0.90	0.90	0.90	-99.00	1.67	0.57	2.33
2	2	2	2	20	0	2	1	1	4	1	4	3	3	3	4	3	3	2	2	3	3	3	2	4	2	3	3	1	2	3	1	4	2	1	1	1	1	1	2	0.50	0.70	0.70	0.70	0.90	0.70	-99.00	1.67	0.70	3.67
2	2	2	2	25	0	3	1	1	3	1	5	2	3	2	5	4	4	5	1	4	2	4	1	3	2	2	2	2	2	3	2	3	3	2	2	2	2	2	3	0.50	0.30	0.50	0.30	0.90	0.50	-99.00	2.33	0.50	3.00
2	2	2	1	30	0	4	1	1	2	2	2	2	2	3	2	2	3	2	2	3	2	2	2	2	2	2	2	2	2	2	2	2	2	2	2	2	2	2	3	0.70	0.90	-99.00	0.70	0.90	0.70	-99.00	2.08	0.80	2.00
2	2	2	2	26	0	1	2	1	2	3	2	3	4	3	2	2	2	4	3	2	3	4	2	4	3	4	2	2	1	3	1	2	1	2	1	2	2	2	1	0.30	0.30	0.50	0.70	0.90	0.70	-99.00	1.67	0.53	3.33
2	2	2	1	23	0	2	2	1	5	1	2	5	4	3	2	3	2	5	3	4	2	4	3	2	4	2	2	1	1	1	1	3	2	2	1	2	2	1	2	0.90	0.90	0.90	0.90	-99.00	0.90	-99.00	1.58	0.90	3.67
2	2	2	2	24	0	4	1	1	2	4	4	3	2	3	4	4	4	1	3	4	2	3	2	3	2	2	4	2	2	2	2	2	3	2	4	-99	2	2	3	0.90	0.90	0.90	0.90	0.90	0.90	-99.00	2.36	0.90	2.33
2	2	2	1	34	1	2	1	1	2	2	2	4	3	4	3	4	4	3	3	4	4	5	3	5	3	3	3	2	2	1	2	2	2	3	2	3	2	2	3	0.70	0.70	0.70	0.70	0.50	0.90	-99.00	2.17	0.67	3.33
2	2	2	2	69	1	2	1	1	4	2	4	4	-99	4	4	4	4	2	4	4	4	4	3	4	3	3	4	2	3	4	2	4	3	2	2	3	3	2	3	0.70	0.70	0.70	0.90	-99.00	0.70	-99.00	2.75	0.77	4.00
2	2	2	2	45	0	2	2	2	5	1	1	1	1	1	1	3	5	1	1	4	5	5	4	5	3	4	5	3	2	3	2	3	2	4	1	4	2	1	3	0.70	0.50	0.30	0.50	0.70	0.70	-99.00	2.50	0.50	3.67
2	2	2	2	38	0	2	1	1	3	2	4	4	4	4	2	4	2	3	3	4	4	3	3	4	4	4	4	2	3	3	2	3	1	2	2	3	3	2	3	0.50	0.50	0.70	0.70	0.50	0.70	-99.00	2.42	0.60	3.67
2	2	2	1	45	0	2	1	1	4	1	3	2	2	3	3	4	2	3	3	3	3	4	3	4	3	4	4	3	1	3	2	4	4	3	2	4	3	2	4	0.70	0.70	0.70	0.70	0.70	0.50	-99.00	2.92	0.70	3.33
2	2	2	1	54	0	4	1	2	3	3	4	5	2	4	3	4	4	4	4	3	3	4	4	3	2	3	3	3	1	3	-99	4	3	3	2	3	3	2	3	0.70	0.70	0.70	0.50	0.70	0.90	-99.00	2.73	0.67	2.67
2	2	2	1	31	0	2	2	2	2	1	3	4	2	4	4	4	4	2	2	4	3	4	1	3	3	2	3	2	2	2	2	3	2	1	2	2	2	1	2	0.50	0.90	0.70	0.70	-99.00	0.90	-99.00	1.92	0.70	2.33
2	2	2	2	26	0	2	2	1	4	1	4	4	4	3	-99	2	4	2	1	2	3	4	3	4	4	4	3	2	2	2	2	3	2	3	2	2	2	2	2	0.50	0.90	0.70	0.90	-99.00	0.90	-99.00	2.17	0.77	4.00
2	2	2	2	26	0	2	2	1	2	2	1	3	2	4	3	2	2	1	2	4	3	4	3	4	3	3	2	2	4	-99	2	1	4	4	2	2	4	2	4	0.90	0.90	0.70	0.70	0.70	0.70	-99.00	2.82	0.77	2.67
2	2	2	1	74	0	2	1	1	2	1	2	4	2	4	2	2	2	4	2	4	4	4	2	2	2	2	2	3	1	2	2	2	2	3	2	2	2	2	2	0.70	0.70	0.70	0.70	0.70	0.70	-99.00	2.08	0.70	2.00
2	2	2	2	50	0	3	1	1	2	1	2	3	3	3	2	2	3	4	3	4	4	4	3	4	3	4	3	2	2	3	2	3	2	3	2	3	2	2	3	0.70	0.70	0.50	0.50	0.70	0.50	-99.00	2.42	0.60	3.00
2	2	2	1	55	0	4	1	1	4	3	2	5	4	4	3	2	2	3	2	3	4	4	2	4	2	2	2	2	2	2	2	3	2	3	2	3	2	1	2	0.50	0.70	0.70	0.70	0.70	0.70	-99.00	2.17	0.67	4.00
2	2	2	2	58	0	2	1	1	3	1	4	4	5	4	4	5	3	3	1	5	4	5	1	3	1	1	1	1	1	2	2	2	2	3	4	2	4	2	3	0.70	0.70	0.70	0.70	0.70	0.30	-99.00	2.33	0.70	3.67
2	2	2	2	52	0	1	1	1	1	1	1	5	1	5	5	1	1	1	1	1	5	5	1	4	1	1	1	1	1	1	1	1	1	1	1	1	1	1	1	0.90	0.90	0.90	0.90	0.90	0.70	-99.00	1.00	0.90	2.00
2	2	2	1	59	0	2	1	2	2	1	4	3	4	4	4	4	4	2	3	4	4	3	4	3	3	2	3	2	2	2	2	2	2	2	2	2	2	2	2	0.70	0.70	0.70	0.70	0.70	0.90	-99.00	2.00	0.70	3.00
2	2	2	2	29	0	4	2	1	1	5	2	3	2	2	3	2	2	2	2	2	4	4	2	4	2	4	2	2	1	2	2	2	2	3	2	2	2	2	2	0.70	0.70	0.70	0.70	0.90	0.70	-99.00	2.00	0.73	2.33
2	2	2	1	26	0	2	1	1	2	2	3	3	3	3	4	3	3	2	2	2	3	4	3	4	3	3	3	2	2	2	2	3	3	2	2	2	2	2	2	0.70	0.70	0.70	0.70	0.70	0.50	-99.00	2.17	0.70	3.00
2	2	2	2	61	1	3	1	1	2	2	4	2	2	2	4	4	1	4	4	4	2	2	2	4	2	2	4	2	2	2	2	3	2	2	2	2	2	2	2	0.90	0.90	0.90	0.70	-99.00	0.90	-99.00	2.08	0.83	2.67
2	2	2	2	54	0	1	1	1	2	2	2	2	2	2	4	2	2	2	2	2	2	4	2	2	2	2	2	2	1	1	2	2	1	2	1	2	2	2	2	0.90	0.90	0.90	0.90	0.90	0.90	-99.00	1.67	0.90	2.00
2	2	2	2	72	1	2	2	1	2	4	4	2	2	-99	1	5	4	3	3	4	3	3	3	3	2	2	4	2	3	3	2	3	3	2	2	2	2	2	3	0.70	0.70	0.70	0.90	-99.00	0.90	-99.00	2.42	0.77	2.33
2	2	2	2	52	0	2	1	2	3	5	5	4	2	4	-99	2	4	4	3	4	4	4	1	3	3	2	4	3	2	3	2	3	3	3	2	2	2	2	2	0.50	0.50	0.70	0.30	0.50	0.70	-99.00	2.42	0.53	2.67
2	2	2	2	21	0	3	2	1	2	1	4	4	3	4	4	4	5	1	2	2	2	2	1	4	2	2	2	2	3	2	2	2	2	-99	2	3	2	2	3	0.70	0.50	-99.00	0.90	0.70	0.70	-99.00	2.27	0.70	3.00
2	2	2	2	29	0	4	2	1	3	2	4	4	2	2	4	4	4	5	3	4	3	4	2	4	2	4	3	2	3	3	2	3	3	2	2	2	3	2	3	0.70	0.50	0.50	0.70	0.70	0.70	-99.00	2.50	0.60	3.00
2	2	2	2	27	1	2	2	1	3	4	1	4	5	5	3	3	-99	4	4	4	5	4	2	5	2	2	2	2	1	1	3	1	1	3	3	2	2	2	2	0.10	0.30	0.30	0.10	0.70	0.70	-99.00	1.92	0.30	4.33
2	2	2	2	40	1	2	2	1	3	2	2	3	1	4	4	4	4	2	4	4	4	4	2	4	2	2	3	2	3	2	2	3	3	3	3	3	3	2	3	0.90	0.90	0.90	0.70	-99.00	0.70	-99.00	2.67	0.83	2.67
2	2	2	1	52	0	2	1	2	3	1	2	4	2	4	3	2	2	2	3	2	4	4	3	3	3	2	2	3	2	3	2	3	2	2	2	2	2	2	2	0.70	0.70	0.90	0.70	0.70	0.70	-99.00	2.25	0.77	2.67
2	2	2	2	31	0	2	2	1	3	3	2	5	4	4	3	2	1	5	3	4	4	3	3	4	5	2	1	2	3	3	3	3	3	3	3	3	3	3	3	0.50	0.50	0.50	0.70	0.70	0.50	-99.00	2.92	0.57	3.67
2	2	2	2	38	0	4	1	1	2	2	5	5	3	3	4	3	3	4	3	4	4	3	3	4	3	4	4	4	3	1	3	4	3	3	3	2	2	3	3	0.70	0.30	0.50	0.70	0.30	0.50	-99.00	2.83	0.50	3.00
2	2	2	2	16	0	1	2	1	3	-99	5	3	3	3	3	3	3	3	3	5	3	4	3	5	3	3	3	3	2	2	-99	3	2	2	2	2	2	2	2	0.30	0.50	0.50	0.90	-99.00	0.90	-99.00	2.18	0.60	3.67
2	2	2	2	21	0	2	2	1	3	2	3	3	4	3	3	4	4	2	3	4	3	3	3	4	4	4	4	3	2	2	3	3	2	2	3	2	3	2	3	0.50	0.30	0.30	0.70	0.50	0.70	-99.00	2.50	0.43	3.67
2	2	2	2	40	0	1	2	1	1	1	1	3	1	3	1	1	2	3	3	4	3	3	2	3	2	1	3	1	4	4	-99	1	1	4	2	3	4	1	4	0.70	0.70	0.90	0.90	-99.00	0.70	-99.00	2.64	0.83	1.67
2	2	2	2	57	0	2	1	1	3	2	3	3	4	3	4	4	3	3	3	4	4	4	3	4	4	3	4	2	2	3	2	3	3	2	3	3	3	2	3	0.70	0.70	0.70	0.90	0.90	0.90	-99.00	2.58	0.77	3.67
2	2	2	1	46	0	2	1	1	2	2	3	2	2	3	3	2	4	4	2	-99	-99	-99	-99	-99	-99	-99	-99	3	2	3	3	3	3	3	3	3	-99	-99	-99	0.50	0.70	0.70	0.70	0.90	0.70	-99.00	2.89	0.70	2.00
2	2	2	2	45	0	4	2	1	4	2	2	4	4	4	2	2	2	4	2	2	4	4	2	4	4	2	2	2	2	2	2	2	2	3	2	3	2	1	2	0.70	0.70	0.70	0.70	0.90	0.70	-99.00	2.08	0.73	4.00
2	2	2	1	24	0	2	2	1	4	1	5	4	4	4	4	4	5	2	1	3	4	4	1	4	2	2	4	2	1	1	1	2	1	1	1	2	2	1	1	0.50	0.70	0.70	0.70	-99.00	0.90	-99.00	1.33	0.67	4.00
2	2	2	2	57	0	2	1	1	5	4	4	3	4	4	2	2	3	4	3	3	5	5	2	5	4	4	3	2	-99	3	3	3	2	3	2	2	2	3	2	0.30	0.70	0.70	0.70	0.50	0.70	-99.00	2.45	0.60	4.67
2	2	2	2	32	0	2	2	2	5	4	4	5	4	5	4	5	3	4	2	4	5	5	3	5	5	5	5	2	2	3	2	2	1	3	2	1	1	1	2	0.70	0.50	0.70	0.50	0.70	0.90	-99.00	1.83	0.63	4.67
2	2	2	2	35	0	3	1	1	1	1	3	2	1	1	3	2	4	2	2	3	4	4	2	3	5	5	2	1	1	1	1	2	2	2	2	2	2	2	2	0.70	0.90	0.90	0.90	0.90	0.90	-99.00	1.67	0.87	1.67
2	2	2	2	49	0	2	2	1	3	1	2	3	4	3	3	2	3	4	2	3	4	4	3	4	4	4	3	4	2	1	2	2	2	1	2	2	2	1	2	0.30	0.50	0.50	0.70	0.70	0.70	-99.00	1.92	0.53	3.67
2	2	2	1	59	0	2	1	1	3	3	2	2	2	2	2	4	4	4	2	4	3	3	2	4	3	4	4	4	2	4	-99	4	3	4	2	1	4	4	4	0.70	0.10	0.30	0.50	0.10	0.70	-99.00	3.27	0.33	3.00
2	2	2	2	67	0	2	1	1	3	3	3	3	3	3	3	3	3	3	3	5	5	5	3	3	5	5	5	3	1	2	-99	-99	1	-99	-99	4	1	3	2	0.50	0.50	0.50	0.70	0.50	0.70	-99.00	2.13	0.53	3.00
2	2	2	2	60	1	1	1	1	2	2	4	4	5	3	5	5	1	5	3	4	4	4	3	5	3	2	4	3	3	3	3	3	3	3	3	3	3	3	3	0.30	0.30	0.30	0.30	0.50	0.50	-99.00	3.00	0.33	4.00
2	2	2	2	27	0	2	2	1	4	3	4	4	3	4	5	4	5	3	3	4	5	5	3	4	4	3	3	3	3	2	3	3	3	4	3	3	3	2	3	0.70	0.50	0.50	0.70	-99.00	0.50	-99.00	2.92	0.60	3.67
[truncated: 4 more columns]
