# Supplementary material for: How do psychological characteristics of family members affected by substance use influence quality of life?
Source: Qual Life Res. 2019 Mar 20;28(8):2161–70. doi: 10.1007/s11136-019-02169-x (PMC6620238; doi:10.1007/s11136-019-02169-x)
Supplement: Supplementary file 3 — Supplementary material 3 (INP 791 Bytes) [file 11136_2019_2169_MOESM3_ESM.inp]

TITLE:  Latent regression

DATA: FILE IS "1708_FAMstudien_mplus_short7_CSV.csv";

VARIABLE:
  NAMES ARE Gr Gr2 Gr3 Gender Age Living Edu VBA RUS_naa C1 C2 C3 C4 C5 
  C6 C7r C8 C9 C10r C11 C12 C13 C14 C15 C16 C17 C18 C19 F1 F2 F3 F4 F5
  F6 F7 F8 F9 F10 F11 F12 Q_1 Q_2 Q_3 Q_4 Q_5 Q_6 Q_10 FAD_sum
  QoL5_mean SACR_sh CONTR_sh SUPPR_sh COD_mean FAD_mean;
  
  USEVARIABLES ARE  
  C1 C9 C12 C13 C15  C16 C17 C18 C19 
  FAD_mean Q_1 Q_2 Q_3 Q_4 Q_5; 
  MISSING ARE ALL (-99);

ANALYSIS:
  ESTIMATOR IS MLR;
  !MODEL = configural metric scalar;

Model: 
  SACR by C1 C13 C16;
  CONTR BY C15 C17 C18 ;
  SUPPR BY C9 C12 C19;
  
  COD by SACR CONTR SUPPR; 
  QOL BY Q_1 Q_2 Q_3 Q_4 Q_5;

  FAD_mean ON COD;
  QOL ON FAD_mean COD ; 

  MODEL INDIRECT: QOL IND COD;
  
